# Supplementary material for: Development of longitudinal dunes under Pangaean atmospheric circulation
Source: Copernicus journal article supplement (doi:10.5194/cp-18-1529-2022), 2022-07-05
Supplement: Supplementary file 1 [file cp-18-1529-2022-supplement.zip]

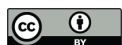

## *Supplement of*

# **Development of longitudinal dunes under Pangaeon atmospheric circulation**

**Hiroki Shozaki and Hitoshi Hasegawa**

*Correspondence to:* Hiroki Shozaki (hi.shozaki@elsi.jp) and Hitoshi Hasegawa (hito\_hase@kochi-u.ac.jp)

- cp-18-1529-2022-supplement-title-page.pdf
- Supplement
  - Supplementary-table.xlsx

The copyright of individual parts of the supplement might differ from the article licence.
