# Supplementary material for: Development of longitudinal dunes under Pangaean atmospheric circulation
Source: Copernicus journal article supplement (doi:10.5194/cp-18-1529-2022), 2022-07-05
Supplement: Supplementary file 1 [file Supplementary-table.xlsx]

## Sheet: Study sites, outcrop code, area
Supplementary Material of "Development of longitudinal dunes under Pangaean atmosphric circulation" by Shozaki H. and Hasegawa H.
This supplementary table include original data of slip-face directions and their corrected value in each sites.
Study sites	Outcrop code		Area
Kelly	Ng016		N
Lander	Ng008-011		N
Weiser Knoll	Ng006,007,012		N
Sheep Creek Gap	Ng015		N
Vernal	Ng001-005,Nv075		N
Dinosaur	Nv076-079		N
Temple Mountain	Nv052-054, 150		SE
Fruita	Nv049,055-057, 151-152		SE
Canyonlands	Nv069-074		SE
Arches	Nv068,080-109		SE
Lightning Dlow	Nv067		SE
Bouler	Nv58-59		SE
Zion	Nv001-016,123-148		SW
Kanab	Nv033-040,Nv063		SW
White Cliff	Nv028-032,149		SW
Spencer Flat	Nv041-048, 060-062, 110-122		SW
Bluff	Nv050,Nv065-066		SW
W.Colorado City	Nv064		SW
Valley of Fire	A001-006		SW
Red rock canyon	A007-010		SW
Horseshoe Bend	Nv017-021		S
W.Kaibito	Nv022,026,027		S
Square Butte	Nv025		S
Shonto	Nv023-024		S

## Sheet: Northern area
DAZ = dip azimuth no correction (positive eastward)						Formation	bed colour
corr.MD = dip azimuth with correct for the modern magnetic declination (+11°)						Navajo Ss.	whitish
corr.CR = dip azimuth with correct for the magnetic declination and post-Jurassic continental clockwise rotation (+5°)						Nugget Ss.	whitish & reddish
* = We have not used to this study due to distant view measurements or vague sedimentary structures						Aztec Ss.	reddish
KUT = tilting correction with KUT
We have used azimuth data whose angle is between 25°-40° to rose diagrams
Kelly
Ng_016KUT
N43 38 20.0 W110 34 24.2
	DAZ(0-360°)	corr.MD(0-360°)	corr.CR(0-360°)	dip_angle(°)
whitish	48	59	64	29
	4	15	20	22
	99	110	115	37
	47	58	63	26
	26	37	42	20
	100	111	116	25
	177	188	193	21
	183	194	199	22
	100	111	116	22
	189	200	205	30
	64	75	80	5
	5	16	21	16
whitish & reddish	–	–	–	–
reddish	–	–	–	–
Lander
Ng_008					Ng_009					Ng_010					Ng_011
N42 50 11.1 W108 49 17.2					N42 49 49.2 W108 50 15.1					N42 49 00.0 W108 48 35.4					N42 49 00.6 W108 47 48.3
	DAZ(0-360°)	corr.MD(0-360°)	corr.CR(0-360°)	dip_angle(°)		DAZ(0-360°)	corr.MD(0-360°)	corr.CR(0-360°)	dip_angle(°)		DAZ(0-360°)	corr.MD(0-360°)	corr.CR(0-360°)	dip_angle(°)		DAZ(0-360°)	corr.MD(0-360°)	corr.CR(0-360°)	dip_angle(°)
whitish	–	–	–	–	whitish	181	192	197	–	whitish	139	150	155	–	whitish	148	159	164	–
whitish & reddish	–	–	–	–		187	198	203	–		275	286	291	–		158	169	174	–
reddish	174	185	190	–		73	84	89	–		84	95	100	–		189	200	205	–
	196	207	212	–		75	86	91	–		154	165	170	–		315	326	331	–
	76	87	92	–	whitish & reddish	–	–	–	–		82	93	98	–		141	152	157	–
	183	194	199	–	reddish	–	–	–	–		101	112	117	–		180	191	196	–
	9	20	25	–							2	13	18	–		75	86	91	–
	138	149	154	–							88	99	104	–		308	319	324	–
	147	158	163	–						whitish & reddish	203	214	219	–		243	254	259	–
	68	79	84	–							124	135	140	–	whitish & reddish	200	211	216	–
											31	42	47	–		149	160	165	–
											216	227	232	–		135	146	151	–
											128	139	144	–		186	197	202	–
											59	70	75	–		186	197	202	–
											200	211	216	–	reddish	–	–	–	–
										reddish	113	124	129	–
											89	100	105	–
Weiser Knoll
Ng_006					Ng_007					Ng_012
N42 36 51.0 W108 36 22.3					N42 37 05.6 W108 36 37.7					N42 37 34.10 W108 36 50.88
	DAZ(0-360°)	corr.MD(0-360°)	corr.CR(0-360°)	dip_angle(°)		DAZ(0-360°)	corr.MD(0-360°)	corr.CR(0-360°)	dip_angle(°)		DAZ(0-360°)	corr.MD(0-360°)	corr.CR(0-360°)	dip_angle(°)
whitish	–	–	–	–	whitish	149	160	165	–	whitish	240	251	256	–
whitish & reddish	–	–	–	–		305	316	321	–	whitish & reddish	–	–	–	–
reddish	268	279	284	–		44	55	60	–	reddish	–	–	–	–
	238	249	254	–		109	120	125	–
	154	165	170	–	whitish & reddish	276	287	292	–
	155	166	171	–		310	321	326	–
	342	353	358	–		109	120	125	–
	98	109	114	–		155	166	171	–
						128	139	144	–
						123	134	139	–
						284	295	300	–
						256	267	272	–
						57	68	73	–
						115	126	131	–
						150	161	166	–
						229	240	245	–
						127	138	143	–
						267	278	283	–
					reddish	15	26	31	–
Sheep Creek Gap
Ng_015
N40 55 48.2 W109 43 17.5
	DAZ(0-360°)	corr.MD(0-360°)	corr.CR(0-360°)	dip_angle(°)
whitish	184	195	200	–
	134	145	150	–
	168	179	184	–
	235	246	251	–
	18	29	34	–
	161	172	177	–
	352	3	8	–
	242	253	258	–
	94	105	110	–
	288	299	304	–
	190	201	206	–
	240	251	256	–
	46	57	62	–
	150	161	166	–
	102	113	118	–
	318	329	334	–
	126	137	142	–
	194	205	210	–
	244	255	260	–
	239	250	255	–
	165	176	181	–
	147	158	163	–
whitish & reddish	–	–	–	–
reddish	–	–	–	–
Vernal
Ng_001					Ng_002					Ng_003					Ng_004					Ng_005
N40 32 54.6 W109 31 29.6					N40 34 45.2 W109 28 31.3					N40 35 04.4 W109 27 08.6					N40 35 08.0 W109 26 43.3					N40 35 03.5 W109 28 12.3
	DAZ(0-360°)	corr.MD(0-360°)	corr.CR(0-360°)	dip_angle(°)		DAZ(0-360°)	corr.MD(0-360°)	corr.CR(0-360°)	dip_angle(°)		DAZ(0-360°)	corr.MD(0-360°)	corr.CR(0-360°)	dip_angle(°)		DAZ(0-360°)	corr.MD(0-360°)	corr.CR(0-360°)	dip_angle(°)		DAZ(0-360°)	corr.MD(0-360°)	corr.CR(0-360°)	dip_angle(°)
whitish	–	–	–	–	whitish	–	–	–	–	whitish	–	–	–	–	whitish	–	–	–	–	whitish	–	–	–	–
whitish & reddish	44	55	60	–	whitish & reddish	208	219	224	–	whitish & reddish	160	171	176	–	whitish & reddish	145	156	161	–	whitish & reddish	–	–	–	–
reddish	–	–	–	–		189	200	205	–		154	165	170	–		129	140	145	–	reddish	214	225	230	–
						237	248	253	–		113	124	129	–		178	189	194	–		196	207	212	–
						166	177	182	–		188	199	204	–		187	198	203	–		217	228	233	–
					reddish	–	–	–	–	reddish	–	–	–	–		187	198	203	–		229	240	245	–
																144	155	160	–		165	176	181	–
																224	235	240	–		237	248	253	–
																185	196	201	–
																194	205	210	–
																274	285	290	–
																170	181	186	–
																196	207	212	–
																237	248	253	–
															reddish	–	–	–	–
Nv_075KUT
N40 26 41.5 W109 15 10.9
	DAZ(0-360°)	corr.MD(0-360°)	corr.CR(0-360°)	dip_angle(°)
whitish	193	204	209	29
	270	281	286	36
whitish & reddish	123	134	139	26
reddish	153	164	169	10
	311	322	327	46
	203	214	219	46
	254	265	270	15
	255	266	271	26
	29	40	45	27
	26	37	42	34
	224	235	240	17
	36	47	52	29
	34	45	50	21
	308	319	324	32
	16	27	32	33
	41	52	57	27
	172	183	188	40
	355	6	11	54
	260	271	276	46
	141	152	157	7
	44	55	60	27
	245	256	261	25
Dinosaur
Nv_076					Nv_077					Nv_078					Nv_079
N40 16 15.1 W108 59 21.7					N40 16 27.5 W108 59 17.9					N40 16 52.3 W108 59 06.2					N40 17 27.8 W108 58 17.4
	DAZ(0-360°)	corr.MD(0-360°)	corr.CR(0-360°)	dip_angle(°)		DAZ(0-360°)	corr.MD(0-360°)	corr.CR(0-360°)	dip_angle(°)		DAZ(0-360°)	corr.MD(0-360°)	corr.CR(0-360°)	dip_angle(°)		DAZ(0-360°)	corr.MD(0-360°)	corr.CR(0-360°)	dip_angle(°)
whitish	225	236	241	33	whitish	204	215	220	22	whitish	230	241	246	24	whitish	250	261	266	32
	232	243	248	40		232	243	248	20		208	219	224	28		28	39	44	36
	227	238	243	32		170	181	186	33		196	207	212	30		222	233	238	32
	182	193	198	32		206	217	222	33	whitish & reddish	–	–	–	–		232	243	248	24
	194	205	210	32		236	247	252	22	reddish	–	–	–	–		240	251	256	24
	250	261	266	28		213	224	229	26							263	274	279	25
	182	193	198	33		204	215	220	22							248	259	264	28
	192	203	208	28		224	235	240	24							230	241	246	30
	232	243	248	34	whitish & reddish	–	–	–	–							232	243	248	30
	232	243	248	36	reddish	–	–	–	–							168	179	184	28
	218	229	234	40												234	245	250	34
	230	241	246	38												208	219	224	34
	216	227	232	34												150	161	166	22
whitish & reddish	–	–	–	–												294	305	310	26
reddish	–	–	–	–												30	41	46	28
																232	243	248	34
																250	261	266	20
																208	219	224	32
															whitish & reddish	–	–	–	–
															reddish	–	–	–	–

## Sheet: Southeastern area
DAZ = dip azimuth no correction (positive eastward)						Formation	bed colour
corr.MD = dip azimuth with correct for the modern magnetic declination (+11°)						Navajo Ss.	whitish
corr.CR = dip azimuth with correct for the magnetic declination and post-Jurassic continental clockwise rotation (+5°)						Nugget Ss.	whitish & reddish
* = We have not used to this study due to distant view measurements or vague sedimentary structures						Aztec Ss.	reddish
KUT = tilting correction with KUT
We have used azimuth data whose angle is between 25°-40° to rose diagrams
Temple Mountain
Nv_052KUT					Nv_053KUT					Nv_054KUT					Nv_150
N38 38 59.0 W110 39 35.9					N38 39 57.1 W110 40 54.8					N38 39 24.3 W110 39 32.9					N38 39 24.30 W110 39 32.90
	DAZ(0-360°)	corr.MD(0-360°)	corr.CR(0-360°)	dip_angle(°)		DAZ(0-360°)	corr.MD(0-360°)	corr.CR(0-360°)	dip_angle(°)		DAZ(0-360°)	corr.MD(0-360°)	corr.CR(0-360°)	dip_angle(°)		DAZ(0-360°)	corr.MD(0-360°)	corr.CR(0-360°)	dip_angle(°)
whitish	333	344	349	24	whitish	80	91	96	18	whitish	167	178	183	31	whitish	–	95	100	–
	315	326	331	34	whitish & reddish	–	–	–	–		242	253	258	41		–	100	105	–
	343	354	359	15	reddish	–	–	–	–		219	230	235	42		–	130	135	–
	329	340	345	12							150	161	166	31		–	135	140	–
	221	232	237	15							185	196	201	39		–	110	115	–
whitish & reddish	–	–	–	–							222	233	238	48		–	90	95	–
reddish	–	–	–	–							173	184	189	41		–	130	135	–
											144	155	160	31		–	120	125	–
											57	68	73	18		–	140	145	–
											203	214	219	45		–	160	165	–
											178	189	194	37		–	170	175	–
											206	217	222	49		–	80	85	–
											181	192	197	38		–	230	235	–
											238	249	254	44		–	210	215	–
											161	172	177	37		–	180	185	–
											52	63	68	17	whitish & reddish	–	–	–	–
											36	47	52	30	reddish	–	–	–	–
											129	140	145	24
											181	192	197	47
											77	88	93	30
										whitish & reddish	–	–	–	–
										reddish	–	–	–	–
Fruita
Nv_049					Nv_055					Nv_056					Nv_057					Nv_151
N38 17 28.8 W111 15 42.2					N38 17 16.7 W111 09 46.9					N38 17 00.1 W111 09 51.9					N38 12 15.3 W111 20 55.9					N38 17 19.3 W111 13 55.1
	DAZ(0-360°)	corr.MD(0-360°)	corr.CR(0-360°)	dip_angle(°)		DAZ(0-360°)	corr.MD(0-360°)	corr.CR(0-360°)	dip_angle(°)		DAZ(0-360°)	corr.MD(0-360°)	corr.CR(0-360°)	dip_angle(°)		DAZ(0-360°)	corr.MD(0-360°)	corr.CR(0-360°)	dip_angle(°)		DAZ(0-360°)	corr.MD(0-360°)	corr.CR(0-360°)	dip_angle(°)
whitish	–	–	–	–	whitish	–	–	–	–	whitish	–	–	–	–	whitish	130	141	146	18	whitish	147	158	163	–
whitish & reddish	–	–	–	–	whitish & reddish	–	–	–	–	whitish & reddish	–	–	–	–		242	253	258	24		150	161	166	–
reddish	94	105	110	–	reddish	104	115	120	42	reddish	116	127	132	18		138	149	154	18		118	129	134	–
	58	69	74	–		232	243	248	34		96	107	112	20		122	133	138	22		204	215	220	–
	96	107	112	–		175	186	191	34						whitish & reddish	–	–	–	–		198	209	214	–
						136	147	152	40						reddish	–	–	–	–	whitish & reddish	152	163	168	–
						102	113	118	43												130	141	146	–
						92	103	108	32												130	141	146	–
						158	169	174	32												128	139	144	–
																					56	67	72	–
																					100	111	116	–
																					175	186	191	–
																					150	161	166	–
																					160	171	176	–
																					108	119	124	–
																				reddish	54	65	70	–
																					84	95	100	–
																					94	105	110	–
																					190	201	206	–
																					54	65	70	–
Nv_152
N38.288125 W111.242570
	DAZ(0-360°)	corr.MD(0-360°)	corr.CR(0-360°)	dip_angle(°)
whitish	–	–	–	–
whitish & reddish	–	–	–	–
reddish	63	74	79	–
	59	70	75	–
	42	53	58	–
	209	220	225	–
	111	122	127	–
	111	122	127	–
	39	50	55	–
Canyonlands
Nv_069					Nv_070					Nv_071KUT					Nv_072					Nv_073
N38 27 35.5 W109 49 12.2					N38 23 28.7 W109 52 45.5					N38 25 37.5 W109 55 34.8					N38 24 43.4 W109 54 17.3					N38 23 58.5 W109 53 28.8
	DAZ(0-360°)	corr.MD(0-360°)	corr.CR(0-360°)	dip_angle(°)		DAZ(0-360°)	corr.MD(0-360°)	corr.CR(0-360°)	dip_angle(°)		DAZ(0-360°)	corr.MD(0-360°)	corr.CR(0-360°)	dip_angle(°)		DAZ(0-360°)	corr.MD(0-360°)	corr.CR(0-360°)	dip_angle(°)		DAZ(0-360°)	corr.MD(0-360°)	corr.CR(0-360°)	dip_angle(°)
whitish	147	158	163	29	whitish	106	117	122	28	whitish	244	255	260	27	whitish	86	97	102	32	whitish	282	293	298	18
	264	275	280	34		154	165	170	28		226	237	242	32		182	193	198	48		80	91	96	38
	92	103	108	18		248	259	264	20		230	241	246	22		134	145	150	30		310	321	326	34
	114	125	130	30		94	105	110	40		301	312	317	8		72	83	88	32		302	313	318	36
	75	86	91	32		78	89	94	32		277	288	293	63		130	141	146	33		334	345	350	33
	89	100	105	35		202	213	218	24		239	250	255	41		130	141	146	26		310	321	326	28
	258	269	274	28		70	81	86	34		213	224	229	27		6	17	22	34		120	131	136	30
	52	63	68	22	whitish & reddish	–	–	–	–		236	247	252	12		244	255	260	32		122	133	138	30
	72	83	88	32	reddish	–	–	–	–		232	243	248	44		62	73	78	26		110	121	126	28
	110	121	126	20							248	259	264	30		67	78	83	33		50	61	66	32
	288	299	304	37							268	279	284	3		95	106	111	30	whitish & reddish	–	–	–	–
	20	31	36	30						whitish & reddish	–	–	–	–		178	189	194	35	reddish	–	–	–	–
	338	349	354	18						reddish	–	–	–	–		12	23	28	30
	355	6	11	20												163	174	179	34
	98	109	114	24												153	164	169	33
	33	44	49	26												335	346	351	29
	166	177	182	20											whitish & reddish	–	–	–	–
	154	165	170	14											reddish	–	–	–	–
whitish & reddish	–	–	–	–
reddish	–	–	–	–
Nv_074
N38 23 16.6 W109 52 00.4
	DAZ(0-360°)	corr.MD(0-360°)	corr.CR(0-360°)	dip_angle(°)
whitish	116	127	132	30
	82	93	98	28
	122	133	138	30
	124	135	140	32
	125	136	141	32
	106	117	122	28
	148	159	164	33
	94	105	110	27
	75	86	91	33
	48	59	64	33
	69	80	85	33
	232	243	248	24
	141	152	157	23
	196	207	212	28
	124	135	140	32
	72	83	88	20
	198	209	214	25
	96	107	112	28
	42	53	58	25
	238	249	254	28
	226	237	242	24
	218	229	234	36
	153	164	169	22
	218	229	234	23
	253	264	269	33
	200	211	216	30
	60	71	76	22
	170	181	186	22
whitish & reddish	–	–	–	–
reddish	–	–	–	–
Arches
Nv_068					Nv_080					Nv_081					Nv_082					Nv_083
N38 38 44.1 W109 44 11.1					N38 39 37.1 W109 35 16.1					N38 39 32.07 W109 35 14.00					N38 39 26.5 W109 35 14.2					N38 39 22.71 W109 35 15.94
	DAZ(0-360°)	corr.MD(0-360°)	corr.CR(0-360°)	dip_angle(°)		DAZ(0-360°)	corr.MD(0-360°)	corr.CR(0-360°)	dip_angle(°)		DAZ(0-360°)	corr.MD(0-360°)	corr.CR(0-360°)	dip_angle(°)		DAZ(0-360°)	corr.MD(0-360°)	corr.CR(0-360°)	dip_angle(°)		DAZ(0-360°)	corr.MD(0-360°)	corr.CR(0-360°)	dip_angle(°)
whitish	192	203	208	20	whitish	190	201	206	32	whitish	145	156	161	34	whitish	212	223	228	33	whitish	166	177	182	32
	170	181	186	27		197	208	213	32		334	345	350	28		205	216	221	34		135	146	151	23
	18	29	34	22		126	137	142	32		356	7	12	30		152	163	168	32		82	93	98	25
	144	155	160	34		182	193	198	10		154	165	170	32		197	208	213	30		124	135	140	24
	119	130	135	35		92	103	108	20		192	203	208	33		204	215	220	28		188	199	204	30
	99	110	115	31		118	129	134	26		145	156	161	34		188	199	204	32		133	144	149	32
	150	161	166	34		186	197	202	30		210	221	226	32		194	205	210	29		102	113	118	32
	88	99	104	32		118	129	134	30		202	213	218	34		193	204	209	29		152	163	168	32
	86	97	102	28		176	187	192	33		162	173	178	34		207	218	223	32		173	184	189	31
	18	29	34	30		204	215	220	32		188	199	204	30	whitish & reddish	–	–	–	–		182	193	198	26
	63	74	79	31		192	203	208	34		208	219	224	33	reddish	–	–	–	–		159	170	175	31
	158	169	174	27		194	205	210	34	whitish & reddish	–	–	–	–							135	146	151	25
	60	71	76	27		196	207	212	30	reddish	–	–	–	–							131	142	147	27
	86	97	102	35		194	205	210	30												104	115	120	30
	206	217	222	32		130	141	146	30												204	215	220	29
	199	210	215	28		182	193	198	30												274	285	290	31
	66	77	82	28		198	209	214	26												152	163	168	28
	262	273	278	24		202	213	218	28												239	250	255	31
	214	225	230	28		108	119	124	26												118	129	134	27
	52	63	68	22		154	165	170	28											whitish & reddish	–	–	–	–
	198	209	214	30		118	129	134	28											reddish	–	–	–	–
	274	285	290	24		142	153	158	30
	160	171	176	26		124	135	140	30
	247	258	263	24		196	207	212	26
	230	241	246	18		200	211	216	30
	288	299	304	24	whitish & reddish	–	–	–	–
	293	304	309	22	reddish	–	–	–	–
	148	159	164	22
	309	320	325	33
	20	31	36	32
	138	149	154	28
	208	219	224	34
	72	83	88	22
	206	217	222	24
	326	337	342	27
	230	241	246	25
	251	262	267	32
	217	228	233	31
	132	143	148	34
	188	199	204	18
	168	179	184	38
	166	177	182	30
	160	171	176	22
	230	241	246	30
	46	57	62	38
	338	349	354	24
	60	71	76	28
	348	359	4	20
	218	229	234	30
whitish & reddish	110	121	126	30
	64	75	80	20
	140	151	156	26
	282	293	298	32
	94	105	110	18
	222	233	238	42
	260	271	276	14
	118	129	134	26
	225	236	241	30
reddish	–	–	–	–
Nv_084					Nv_085					Nv_086					Nv_087					Nv_088
N38 39 17.20 W109 35 22.80					N38 40 13.5 W109 35 12.9					N38 40 05.1 W109 35 09.4					N38 39 59.7 W109 35 08.8					N38 40 51.4 W109 35 03.9
	DAZ(0-360°)	corr.MD(0-360°)	corr.CR(0-360°)	dip_angle(°)		DAZ(0-360°)	corr.MD(0-360°)	corr.CR(0-360°)	dip_angle(°)		DAZ(0-360°)	corr.MD(0-360°)	corr.CR(0-360°)	dip_angle(°)		DAZ(0-360°)	corr.MD(0-360°)	corr.CR(0-360°)	dip_angle(°)		DAZ(0-360°)	corr.MD(0-360°)	corr.CR(0-360°)	dip_angle(°)
whitish	113	124	129	28	whitish	255	266	271	19	whitish	166	177	182	32	whitish	98	109	114	30	whitish	82	93	98	30
	146	157	162	27		144	155	160	28		146	157	162	33		148	159	164	30		226	237	242	30
	345	356	1	12		195	206	211	32		192	203	208	30		124	135	140	30		66	77	82	28
	174	185	190	32		120	131	136	34		182	193	198	30		196	207	212	32		44	55	60	32
	126	137	142	30		58	69	74	34		158	169	174	32		238	249	254	32		86	97	102	30
	253	264	269	15		38	49	54	31		154	165	170	33		196	207	212	30		190	201	206	30
	162	173	178	28		138	149	154	32		32	43	48	32		187	198	203	30		190	201	206	30
	72	83	88	28		174	185	190	32		197	208	213	32		181	192	197	30		330	341	346	18
	274	285	290	28		146	157	162	32		192	203	208	30		181	192	197	30		170	181	186	32
	127	138	143	29		238	249	254	30		166	177	182	28		219	230	235	28		272	283	288	23
	135	146	151	33		254	265	270	28		202	213	218	30		156	167	172	28		120	131	136	32
	122	133	138	29		148	159	164	32		186	197	202	30		153	164	169	30		123	134	139	30
	237	248	253	30		214	225	230	30		70	81	86	30		178	189	194	30		252	263	268	28
whitish & reddish	–	–	–	–		128	139	144	32		99	110	115	30		172	183	188	30		140	151	156	30
reddish	–	–	–	–		164	175	180	30		143	154	159	30	whitish & reddish	–	–	–	–		162	173	178	30
						130	141	146	32		164	175	180	30	reddish	–	–	–	–		92	103	108	30
						154	165	170	28	whitish & reddish	–	–	–	–							128	139	144	30
						135	146	151	33	reddish	–	–	–	–							222	233	238	23
						137	148	153	32												178	189	194	30
						130	141	146	30												154	165	170	32
						170	181	186	34												169	180	185	30
						224	235	240	28												166	177	182	30
						138	149	154	32												14	25	30	30
						130	141	146	33												136	147	152	30
						134	145	150	31											whitish & reddish	–	–	–	–
						172	183	188	31											reddish	–	–	–	–
					whitish & reddish	–	–	–	–
					reddish	–	–	–	–
Nv_089					Nv_090					Nv_091					Nv_092					Nv_093
N38 41 7.59 W109 34 53.86					N38 41 8.46 W109 34 51.79					N38 41 24.9 W109 34 34.0					N38 41 21.4 W109 34. 33.3					N38 42 08.3 W109 33 58.5
	DAZ(0-360°)	corr.MD(0-360°)	corr.CR(0-360°)	dip_angle(°)		DAZ(0-360°)	corr.MD(0-360°)	corr.CR(0-360°)	dip_angle(°)		DAZ(0-360°)	corr.MD(0-360°)	corr.CR(0-360°)	dip_angle(°)		DAZ(0-360°)	corr.MD(0-360°)	corr.CR(0-360°)	dip_angle(°)		DAZ(0-360°)	corr.MD(0-360°)	corr.CR(0-360°)	dip_angle(°)
whitish	140	151	156	30	whitish	62	73	78	30	whitish	242	253	258	30	whitish	184	195	200	30	whitish	145	156	161	30
	134	145	150	30		57	68	73	30		154	165	170	32		171	182	187	30		142	153	158	30
	140	151	156	30		260	271	276	30		198	209	214	28		160	171	176	30		166	177	182	27
	210	221	226	32		244	255	260	30		176	187	192	28		136	147	152	30		178	189	194	28
	130	141	146	32		46	57	62	30		56	67	72	23		139	150	155	30		218	229	234	30
	10	21	26	18		94	105	110	28		106	117	122	24		208	219	224	20		176	187	192	32
	150	161	166	30		178	189	194	28		165	176	181	32		194	205	210	26		156	167	172	32
	80	91	96	28		138	149	154	28		148	159	164	32		222	233	238	27		141	152	157	32
	190	201	206	30		164	175	180	26		220	231	236	32		234	245	250	20	whitish & reddish	–	–	–	–
	244	255	260	30		202	213	218	30		70	81	86	23	whitish & reddish	–	–	–	–	reddish	–	–	–	–
	242	253	258	22		78	89	94	26		248	259	264	28	reddish	–	–	–	–
	358	9	14	18		254	265	270	30		253	264	269	30
	56	67	72	28		244	255	260	28		216	227	232	30
	112	123	128	30		106	117	122	26		176	187	192	30
	172	183	188	30		233	244	249	24		146	157	162	28
	124	135	140	32		182	193	198	26	whitish & reddish	–	–	–	–
	158	169	174	32		218	229	234	30	reddish	–	–	–	–
	200	211	216	28		170	181	186	30
	164	175	180	32		136	147	152	30
	144	155	160	30	whitish & reddish	–	–	–	–
whitish & reddish	–	–	–	–	reddish	–	–	–	–
reddish	–	–	–	–
Nv_094					Nv_095					Nv_096					Nv_097					Nv_098
N38 42 9.19 W109 33 58.94					N38 42 7.50 W109 33 54.11					N38 42 10.42 W109 33 55.16					N38 42 9.48 W109 33 50.73					N38 41 39.14 W109 32 54.51
	DAZ(0-360°)	corr.MD(0-360°)	corr.CR(0-360°)	dip_angle(°)		DAZ(0-360°)	corr.MD(0-360°)	corr.CR(0-360°)	dip_angle(°)		DAZ(0-360°)	corr.MD(0-360°)	corr.CR(0-360°)	dip_angle(°)		DAZ(0-360°)	corr.MD(0-360°)	corr.CR(0-360°)	dip_angle(°)		DAZ(0-360°)	corr.MD(0-360°)	corr.CR(0-360°)	dip_angle(°)
whitish	132	143	148	32	whitish	198	209	214	30	whitish	100	111	116	30	whitish	152	163	168	30	whitish	80	91	96	15
	152	163	168	32		162	173	178	26		127	138	143	32		138	149	154	30		83	94	99	11
	138	149	154	30		196	207	212	24		190	201	206	30		154	165	170	30		68	79	84	31
	140	151	156	30	whitish & reddish	–	–	–	–		153	164	169	30		132	143	148	30		188	199	204	27
whitish & reddish	–	–	–	–	reddish	–	–	–	–		195	206	211	30		157	168	173	30		116	127	132	28
reddish	–	–	–	–							148	159	164	30		159	170	175	30		73	84	89	28
											148	159	164	30		176	187	192	30		74	85	90	26
											92	103	108	30		166	177	182	30		218	229	234	26
											135	146	151	30		172	183	188	30		265	276	281	32
											156	167	172	30		157	168	173	30		88	99	104	32
											107	118	123	30		167	178	183	30		235	246	251	32
											113	124	129	30		186	197	202	30		249	260	265	30
											140	151	156	30		114	125	130	30		256	267	272	30
											153	164	169	30		98	109	114	25		260	271	276	22
											134	145	150	30		230	241	246	26		122	133	138	24
											94	105	110	30		163	174	179	30		68	79	84	30
											118	129	134	30	whitish & reddish	–	–	–	–		98	109	114	28
											118	129	134	30	reddish	–	–	–	–		88	99	104	30
										whitish & reddish	–	–	–	–							251	262	267	30
										reddish	–	–	–	–							122	133	138	28
																					190	201	206	31
																					142	153	158	28
																					227	238	243	30
																					114	125	130	22
																				whitish & reddish	–	–	–	–
																				reddish	–	–	–	–
Nv_099					Nv_100					Nv_101					Nv_102					Nv_103
N38 41 37.13 W109 32 50.08					N38 41 38.59 W109 32 58.56					N38 41 53.84 W109 32 58.86					N38 41 53.64 W109 33 4.17					N38 42 6.48 W109 32 58.87
	DAZ(0-360°)	corr.MD(0-360°)	corr.CR(0-360°)	dip_angle(°)		DAZ(0-360°)	corr.MD(0-360°)	corr.CR(0-360°)	dip_angle(°)		DAZ(0-360°)	corr.MD(0-360°)	corr.CR(0-360°)	dip_angle(°)		DAZ(0-360°)	corr.MD(0-360°)	corr.CR(0-360°)	dip_angle(°)		DAZ(0-360°)	corr.MD(0-360°)	corr.CR(0-360°)	dip_angle(°)
whitish	141	152	157	27	whitish	112	123	128	26	whitish	104	115	120	30	whitish	186	197	202	27	whitish	144	155	160	30
	48	59	64	32		138	149	154	26		62	73	78	30		216	227	232	32		106	117	122	30
	172	183	188	32		142	153	158	30		135	146	151	30		196	207	212	28		140	151	156	30
	21	32	37	30		162	173	178	30		126	137	142	32		184	195	200	30		80	91	96	30
	45	56	61	32		172	183	188	26		146	157	162	32		222	233	238	29		177	188	193	26
	172	183	188	30	whitish & reddish	–	–	–	–		172	183	188	30		204	215	220	30		126	137	142	26
	130	141	146	30	reddish	–	–	–	–		152	163	168	30		216	227	232	30		119	130	135	30
	86	97	102	30							127	138	143	30		221	232	237	25		210	221	226	30
	62	73	78	30							174	185	190	30	whitish & reddish	–	–	–	–		83	94	99	26
	120	131	136	30							57	68	73	26	reddish	–	–	–	–		160	171	176	24
	100	111	116	32						whitish & reddish	–	–	–	–							201	212	217	23
	146	157	162	32						reddish	–	–	–	–							102	113	118	30
whitish & reddish	–	–	–	–																whitish & reddish	–	–	–	–
reddish	–	–	–	–																reddish	–	–	–	–
Nv_104					Nv_105					Nv_106					Nv_107					Nv_108
N38 42 6.26 W109 33 2.99					N38 42 11.1 W109 33 12.8					N38 39 37.0 W109 35 11.5					N38 39 41.5 W109 35 09.7					N38 39 44.9 W109 35 11.9
	DAZ(0-360°)	corr.MD(0-360°)	corr.CR(0-360°)	dip_angle(°)		DAZ(0-360°)	corr.MD(0-360°)	corr.CR(0-360°)	dip_angle(°)		DAZ(0-360°)	corr.MD(0-360°)	corr.CR(0-360°)	dip_angle(°)		DAZ(0-360°)	corr.MD(0-360°)	corr.CR(0-360°)	dip_angle(°)		DAZ(0-360°)	corr.MD(0-360°)	corr.CR(0-360°)	dip_angle(°)
whitish	260	271	276	23	whitish	156	167	172	30	whitish	148	159	164	30	whitish	166	177	182	30	whitish	186	197	202	30
	122	133	138	26		140	151	156	30		122	133	138	30		124	135	140	30		195	206	211	30
	109	120	125	29		172	183	188	28		208	219	224	30		212	223	228	30		195	206	211	30
whitish & reddish	–	–	–	–		142	153	158	30		212	223	228	30		144	155	160	30	whitish & reddish	–	–	–	–
reddish	–	–	–	–		140	151	156	30		200	211	216	30		144	155	160	30	reddish	–	–	–	–
						136	147	152	30		126	137	142	30		230	241	246	30
						186	197	202	30		174	185	190	30		132	143	148	30
						158	169	174	30		153	164	169	30		127	138	143	30
						237	248	253	30		153	164	169	30		148	159	164	30
						215	226	231	26		158	169	174	30		208	219	224	30
						188	199	204	28		168	179	184	30		113	124	129	30
						152	163	168	30		110	121	126	30		146	157	162	30
						80	91	96	30		143	154	159	30		219	230	235	30
						184	195	200	30		168	179	184	30		119	130	135	30
						173	184	189	30		176	187	192	30		232	243	248	30
						130	141	146	30		192	203	208	30		175	186	191	30
					whitish & reddish	–	–	–	–		186	197	202	30		86	97	102	30
					reddish	–	–	–	–		220	231	236	30	whitish & reddish	–	–	–	–
											186	197	202	30	reddish	–	–	–	–
											138	149	154	30
											145	156	161	30
											47	58	63	28
											170	181	186	30
											115	126	131	28
											135	146	151	30
										whitish & reddish	–	–	–	–
										reddish	–	–	–	–
Nv_109
N38 40 31.0 W109 35 0.98
	DAZ(0-360°)	corr.MD(0-360°)	corr.CR(0-360°)	dip_angle(°)
whitish	144	155	160	30
	188	199	204	30
	166	177	182	30
	222	233	238	30
	76	87	92	30
	116	127	132	30
	146	157	162	30
	118	129	134	30
	172	183	188	30
	16	27	32	30
	113	124	129	30
	242	253	258	30
	170	181	186	30
whitish & reddish	–	–	–	–
reddish	–	–	–	–
Lightning Dlow
Nv_067
N38 08 43.5 W109 20 24.0
	DAZ(0-360°)	corr.MD(0-360°)	corr.CR(0-360°)	dip_angle(°)
whitish	80	91	96	20
	126	137	142	24
	66	77	82	26
	100	111	116	26
	118	129	134	26
	274	285	290	34
	128	139	144	28
	150	161	166	20
	100	111	116	22
	18	29	34	20
whitish & reddish	–	–	–	–
reddish	–	–	–	–
Bouler
Nv_058					Nv_059
N37 53 40.0 W111 27 22.2					N37 53 24.4 W111 26 47.8
	DAZ(0-360°)	corr.MD(0-360°)	corr.CR(0-360°)	dip_angle(°)		DAZ(0-360°)	corr.MD(0-360°)	corr.CR(0-360°)	dip_angle(°)
whitish	112	123	128	24	whitish	10	21	26	18
	80	91	96	34		70	81	86	22
	144	155	160	14		190	201	206	30
	104	115	120	26		126	137	142	28
	118	129	134	26		168	179	184	38
whitish & reddish	–	–	–	–		240	251	256	30
reddish	–	–	–	–		190	201	206	30
						204	215	220	34
						256	267	272	20
						218	229	234	22
						162	173	178	34
						184	195	200	32
						160	171	176	28
						192	203	208	34
						68	79	84	28
						116	127	132	35
						74	85	90	22
					whitish & reddish	–	–	–	–
					reddish	–	–	–	–

## Sheet: Southwestern area
DAZ = dip azimuth no correction (positive eastward)						Formation	bed colour
corr.MD = dip azimuth with correct for the modern magnetic declination (+11°)						Navajo Ss.	whitish
corr.CR = dip azimuth with correct for the magnetic declination and post-Jurassic continental clockwise rotation (+5°)						Nugget Ss.	whitish & reddish
* = We have not used to this study due to distant view measurements or vague sedimentary structures						Aztec Ss.	reddish
KUT = tilting correction with KUT
We have used azimuth data whose angle is between 25°-40° to rose diagrams
Zion
Nv_001					Nv_002					Nv_003					Nv_004					Nv_005
N37 11 56.8 W112 59 13.9					N37 12 45.0 W112 58 40.5					N37 13 33.0 W112 58 03.0					N37 14 26.5 W112 57 29.7					N37 13 00.5 W112 58 00.1
	DAZ(0-360°)	corr.MD(0-360°)	corr.CR(0-360°)	dip_angle(°)		DAZ(0-360°)	corr.MD(0-360°)	corr.CR(0-360°)	dip_angle(°)		DAZ(0-360°)	corr.MD(0-360°)	corr.CR(0-360°)	dip_angle(°)		DAZ(0-360°)	corr.MD(0-360°)	corr.CR(0-360°)	dip_angle(°)		DAZ(0-360°)	corr.MD(0-360°)	corr.CR(0-360°)	dip_angle(°)
whitish	–	–	–	–	whitish	–	–	–	–	whitish	–	–	–	–	whitish	–	–	–	–	whitish	112	123	128	–
whitish & reddish	158	169	174	–	whitish & reddish	164	175	180	–	whitish & reddish	206	217	222	–	whitish & reddish	190	201	206	–	whitish & reddish	152	163	168	–
	140	151	156	–		150	161	166	–	reddish	–	–	–	–		210	221	226	–		204	215	220	–
	178	189	194	–		210	221	226	–						reddish	190	201	206	–	reddish	–	–	–	–
	168	179	184	–	reddish	–	–	–	–
	194	205	210	–
	194	205	210	–
reddish	–	–	–	–
Nv_006					Nv_007					Nv_008					Nv_009					Nv_010
N37 12 53.8 W112 57 51.8					N37 12 52.0 W112 57 29.1					N37 12 47.8 W112 57 32.8					N37 12 47.6 W112 56 25.7					N37 12 55.8 W112 56 09.5	N37 12 55.8W112 56 09.5	N37 12 55.8W112 56 09.5	N37 12 55.8W112 56 09.5	N37 12 55.8W112 56 09.5
	DAZ(0-360°)	corr.MD(0-360°)	corr.CR(0-360°)	dip_angle(°)		DAZ(0-360°)	corr.MD(0-360°)	corr.CR(0-360°)	dip_angle(°)		DAZ(0-360°)	corr.MD(0-360°)	corr.CR(0-360°)	dip_angle(°)		DAZ(0-360°)	corr.MD(0-360°)	corr.CR(0-360°)	dip_angle(°)		DAZ(0-360°)	corr.MD(0-360°)	corr.CR(0-360°)	dip_angle(°)
whitish	102	113	118	–	whitish	–	–	–	–	whitish	340	351	356	–	whitish	–	–	–	–	whitish	–	–	–	–
	230	241	246	–	whitish & reddish	148	159	164	–	whitish & reddish	88	99	104	–	whitish & reddish	205	216	221	–	whitish & reddish	142	153	158	–
whitish & reddish	216	227	232	–		240	251	256	–		344	355	360	–		228	239	244	–		150	161	166	–
reddish	120	131	136	–		240	251	256	–		330	341	346			266	277	282	–		270	281	286	–
					reddish	–	–	–	–		102	113	118			250	261	266	–		136	147	152	–
										reddish	–	–	–	–	reddish	–	–	–	–		330	341	346	–
																					194	205	210	–
																					220	231	236	–
																				reddish	–	–	–	–
Nv_011					Nv_012					Nv_013					Nv_014					Nv_015
N37 12 56.65 W112 55 48.06					N37 13 04.8 W112 55 16.3					N37 13 03.09 W112 55 04.22					N37 13 29.2 W112 54 09.4					N37 13 28.46 W112 53 41.27
	DAZ(0-360°)	corr.MD(0-360°)	corr.CR(0-360°)	dip_angle(°)		DAZ(0-360°)	corr.MD(0-360°)	corr.CR(0-360°)	dip_angle(°)		DAZ(0-360°)	corr.MD(0-360°)	corr.CR(0-360°)	dip_angle(°)		DAZ(0-360°)	corr.MD(0-360°)	corr.CR(0-360°)	dip_angle(°)		DAZ(0-360°)	corr.MD(0-360°)	corr.CR(0-360°)	dip_angle(°)
whitish	126	137	142	–	whitish	–	–	–	–	whitish	230	241	246	–	whitish	130	141	146	–	whitish	258	269	274	–
	300	311	316	–	whitish & reddish	250	261	266	–	whitish & reddish	228	239	244	–		296	307	312	–		226	237	242	–
whitish & reddish	178	189	194	–		104	115	120	–		226	237	242	–		192	203	208	–		226	237	242	–
	240	251	256	–		170	181	186	–		140	151	156	–		192	203	208	–		218	229	234	–
	132	143	148	–	reddish	–	–	–	–		160	171	176	–		202	213	218	–		228	239	244	–
	198	209	214	–							160	171	176	–		284	295	300	–		196	207	212	–
	132	143	148	–							276	287	292	–	whitish & reddish	130	141	146	–	whitish & reddish	–	–	–	–
	270	281	286	–						reddish	–	–	–	–		330	341	346	–	reddish	–	–	–	–
reddish	–	–	–	–												244	255	260	–
																260	271	276	–
																310	321	326	–
																194	205	210	–
															reddish	–	–	–	–
Nv_016					Nv_123					Nv_124					Nv_125					Nv_126
N37 14 04.6 W112 52 07.3					N37 13 52.41 W112 52 27.25					N37 13 35.78 W112 52 49.05					N37 13 26.59 W112 53 13.01					N37 12 51.13 W112 56 25.49
	DAZ(0-360°)	corr.MD(0-360°)	corr.CR(0-360°)	dip_angle(°)		DAZ(0-360°)	corr.MD(0-360°)	corr.CR(0-360°)	dip_angle(°)		DAZ(0-360°)	corr.MD(0-360°)	corr.CR(0-360°)	dip_angle(°)		DAZ(0-360°)	corr.MD(0-360°)	corr.CR(0-360°)	dip_angle(°)		DAZ(0-360°)	corr.MD(0-360°)	corr.CR(0-360°)	dip_angle(°)
whitish	240	251	256	–	whitish	200	211	216	28	whitish	3	14	19	26	whitish	125	136	141	22	whitish	–	–	–	–
	126	137	142	–		168	179	184	28		256	267	272	30		356	7	12	23	whitish & reddish	214	225	230	25
	210	221	226	–		187	198	203	30		328	339	344	26		253	264	269	30		94	105	110	28
whitish & reddish	–	–	–	–	whitish & reddish	–	–	–	–		230	241	246	25		98	109	114	25		218	229	234	32
reddish	–	–	–	–	reddish	–	–	–	–		108	119	124	28		258	269	274	32		77	88	93	30
											312	323	328	26		186	197	202	26		82	93	98	26
											238	249	254	28		154	165	170	26		126	137	142	30
											136	147	152	22		252	263	268	30		236	247	252	26
											217	228	233	32	whitish & reddish	–	–	–	–		148	159	164	29
											208	219	224	30	reddish	–	–	–	–		174	185	190	30
											167	178	183	26						reddish	–	–	–	–
											214	225	230	33
											193	204	209	30
										whitish & reddish	–	–	–	–
										reddish	–	–	–	–
Nv_127					Nv_128					Nv_129					Nv_130					Nv_131
N37 12 55.34 W112 56 21.63					N37 12 54.47 W112 56 6.19					N37 12 51.63 W112 56 2.85					N37 12 48.04 W112 55 53.56					N37 12 54.09 W112 55 48.77
	DAZ(0-360°)	corr.MD(0-360°)	corr.CR(0-360°)	dip_angle(°)		DAZ(0-360°)	corr.MD(0-360°)	corr.CR(0-360°)	dip_angle(°)		DAZ(0-360°)	corr.MD(0-360°)	corr.CR(0-360°)	dip_angle(°)		DAZ(0-360°)	corr.MD(0-360°)	corr.CR(0-360°)	dip_angle(°)		DAZ(0-360°)	corr.MD(0-360°)	corr.CR(0-360°)	dip_angle(°)
whitish	–	–	–	–	whitish	–	–	–	–	whitish	–	–	–	–	whitish	–	–	–	–	whitish	–	–	–	–
whitish & reddish	194	205	210	28	whitish & reddish	206	217	222	25	whitish & reddish	70	81	86	25	whitish & reddish	145	156	161	20	whitish & reddish	153	164	169	20
	217	228	233	30		215	226	231	28		288	299	304	25		234	245	250	28		222	233	238	30
	212	223	228	26		60	71	76	30		118	129	134	25		227	238	243	25		232	243	248	20
	174	185	190	27		235	246	251	26		319	330	335	30		206	217	222	25		128	139	144	25
	144	155	160	25		214	225	230	29		252	263	268	33		100	111	116	28		128	139	144	20
	106	117	122	28		103	114	119	30		122	133	138	28		162	173	178	30		252	263	268	28
	158	169	174	28		54	65	70	30		313	324	329	31		182	193	198	30		170	181	186	30
	82	93	98	27		122	133	138	30		97	108	113	28	reddish	–	–	–	–		198	209	214	30
	115	126	131	30		135	146	151	26		112	123	128	30							138	149	154	30
reddish	–	–	–	–		175	186	191	30	reddish	–	–	–	–							232	243	248	28
						156	167	172	32												160	171	176	26
						152	163	168	32												216	227	232	30
						146	157	162	32												94	105	110	30
						138	149	154	33											reddish	–	–	–	–
					reddish	–	–	–	–
Nv_132					Nv_133					Nv_134					Nv_135					Nv_136
N37 13 3.96 W112 55 27.19					N37 13 4.51 W112 55 15.31					N37 13 27.88 W112 54 4.50					N37 13 30.32 W112 54 8.37					N37 13 7.65 W112 55 7.59
	DAZ(0-360°)	corr.MD(0-360°)	corr.CR(0-360°)	dip_angle(°)		DAZ(0-360°)	corr.MD(0-360°)	corr.CR(0-360°)	dip_angle(°)		DAZ(0-360°)	corr.MD(0-360°)	corr.CR(0-360°)	dip_angle(°)		DAZ(0-360°)	corr.MD(0-360°)	corr.CR(0-360°)	dip_angle(°)		DAZ(0-360°)	corr.MD(0-360°)	corr.CR(0-360°)	dip_angle(°)
whitish	–	–	–	–	whitish	–	–	–	–	whitish	–	–	–	–	whitish	–	–	–	–	whitish	–	–	–	–
whitish & reddish	162	173	178	22	whitish & reddish	213	224	229	26	whitish & reddish	194	205	210	30	whitish & reddish	135	146	151	30	whitish & reddish	246	257	262	28
	106	117	122	27		242	253	258	28		174	185	190	26		312	323	328	22		254	265	270	28
	158	169	174	33		52	63	68	28		104	115	120	30		268	279	284	28		196	207	212	30
	88	99	104	30		80	91	96	30		98	109	114	30		244	255	260	30		216	227	232	30
	132	143	148	28		187	198	203	30		285	296	301	30	reddish	–	–	–	–		194	205	210	30
	128	139	144	30		158	169	174	30		120	131	136	30							173	184	189	30
	92	103	108	26		168	179	184	30		278	289	294	28							128	139	144	30
	168	179	184	25		177	188	193	30		128	139	144	30							227	238	243	30
	84	95	100	26		54	65	70	30		139	150	155	30						reddish	–	–	–	–
	114	125	130	28		32	43	48	28	reddish	–	–	–	–
	155	166	171	28		106	117	122	28
	160	171	176	28		83	94	99	30
	118	129	134	26		95	106	111	26
	208	219	224	28	reddish	–	–	–	–
	99	110	115	28
	124	135	140	27
	213	224	229	32
	168	179	184	28
	196	207	212	30
	148	159	164	30
	173	184	189	32
	186	197	202	30
	206	217	222	30
reddish	–	–	–	–
Nv_137					Nv_138					Nv_139					Nv_140					Nv_141
N37 13 26.58 W112 54 41.56					N37 13 21.04 W112 54 59.26					N37 13 30.97 W112 54 32.10					N37 13 27.67 W112 54 13.85					N37 13 25.49 W112 53 58.52
	DAZ(0-360°)	corr.MD(0-360°)	corr.CR(0-360°)	dip_angle(°)		DAZ(0-360°)	corr.MD(0-360°)	corr.CR(0-360°)	dip_angle(°)		DAZ(0-360°)	corr.MD(0-360°)	corr.CR(0-360°)	dip_angle(°)		DAZ(0-360°)	corr.MD(0-360°)	corr.CR(0-360°)	dip_angle(°)		DAZ(0-360°)	corr.MD(0-360°)	corr.CR(0-360°)	dip_angle(°)
whitish	–	–	–	–	whitish	–	–	–	–	whitish	–	–	–	–	whitish	–	–	–	–	whitish	–	–	–	–
whitish & reddish	265	276	281	28	whitish & reddish	202	213	218	28	whitish & reddish	124	135	140	28	whitish & reddish	125	136	141	31	whitish & reddish	124	135	140	30
	308	319	324	30		202	213	218	30		135	146	151	28		242	253	258	26		176	187	192	26
	124	135	140	28		266	277	282	30		138	149	154	28		264	275	280	30		158	169	174	28
	238	249	254	28		338	349	354	26		85	96	101	30		262	273	278	28		154	165	170	25
	238	249	254	25		304	315	320	28		120	131	136	28		186	197	202	30		164	175	180	26
	112	123	128	28		146	157	162	28		96	107	112	26		188	199	204	30		108	119	124	30
	277	288	293	25		138	149	154	32		104	115	120	25		176	187	192	30		144	155	160	30
	236	247	252	30		128	139	144	30		197	208	213	27		190	201	206	26		135	146	151	30
	190	201	206	28		267	278	283	32		138	149	154	28		210	221	226	30		134	145	150	30
reddish	–	–	–	–		96	107	112	25		122	133	138	28		265	276	281	30		134	145	150	32
						217	228	233	26		114	125	130	28		233	244	249	32		195	206	211	30
						122	133	138	28		107	118	123	26		266	277	282	30		146	157	162	30
						268	279	284	30		134	145	150	28		294	305	310	30		182	193	198	30
						253	264	269	30		74	85	90	26		172	183	188	32		214	225	230	30
						293	304	309	30		105	116	121	27		284	295	300	30	reddish	–	–	–	–
						296	307	312	26		296	307	312	26		218	229	234	32
						262	273	278	30	reddish	–	–	–	–		246	257	262	30
						37	48	53	26							283	294	299	30
						176	187	192	33							286	297	302	30
						116	127	132	26							220	231	236	30
						124	135	140	26						reddish	–	–	–	–
						95	106	111	32
						266	277	282	26
						266	277	282	26
						116	127	132	26
						37	48	53	26
					reddish	–	–	–	–
Nv_142					Nv_143					Nv_144*					Nv_145					Nv_146
N37 13 20.62 W112 53 56.64					N37 13 22.22 W112 53 52.49					N37 13 31.04 W112 53 52.64					N37 13 27.70 W112 53 47.00					N37 13 31.63 W112 53 42.89
	DAZ(0-360°)	corr.MD(0-360°)	corr.CR(0-360°)	dip_angle(°)		DAZ(0-360°)	corr.MD(0-360°)	corr.CR(0-360°)	dip_angle(°)		DAZ(0-360°)	corr.MD(0-360°)	corr.CR(0-360°)	dip_angle(°)		DAZ(0-360°)	corr.MD(0-360°)	corr.CR(0-360°)	dip_angle(°)		DAZ(0-360°)	corr.MD(0-360°)	corr.CR(0-360°)	dip_angle(°)
whitish	–	–	–	–	whitish	–	–	–	–	whitish	348	359	4	30	whitish	191	202	207	27	whitish	114	125	130	30
whitish & reddish	204	215	220	30	whitish & reddish	163	174	179	30		308	319	324	28		163	174	179	30		192	203	208	30
	208	219	224	30		136	147	152	30		353	4	9	30		157	168	173	30		177	188	193	30
	288	299	304	22		262	273	278	25		152	163	168	28		159	170	175	30		172	183	188	30
	122	133	138	25		148	159	164	25		146	157	162	28		143	154	159	32		223	234	239	30
	228	239	244	30		173	184	189	30		236	247	252	28		158	169	174	30		212	223	228	30
	94	105	110	26		178	189	194	30		196	207	212	30		162	173	178	26		178	189	194	30
	243	254	259	28		156	167	172	30		265	276	281	25		136	147	152	32		238	249	254	30
	107	118	123	28		159	170	175	30		186	197	202	30		133	144	149	32		260	271	276	30
	113	124	129	30		162	173	178	30		222	233	238	30		153	164	169	30		210	221	226	30
	106	117	122	28		162	173	178	32		222	233	238	28		148	159	164	30		172	183	188	30
	177	188	193	30		165	176	181	30		324	335	340	25		138	149	154	30		174	185	190	30
	142	153	158	30	reddish	–	–	–	–		202	213	218	25		136	147	152	30		188	199	204	30
	116	127	132	30						whitish & reddish	–	–	–	–		149	160	165	30		216	227	232	30
	98	109	114	30						reddish	–	–	–	–	whitish & reddish	–	–	–	–		328	339	344	25
reddish	–	–	–	–											reddish	–	–	–	–		284	295	300	30
																					94	105	110	26
																				whitish & reddish	–	–	–	–
																				reddish	–	–	–	–
Nv_147					Nv_148
N37 13 26.46 W112 53 33.69					N37 13 32.36 W112 53 36.40
	DAZ(0-360°)	corr.MD(0-360°)	corr.CR(0-360°)	dip_angle(°)		DAZ(0-360°)	corr.MD(0-360°)	corr.CR(0-360°)	dip_angle(°)
whitish	162	173	178	30	whitish	234	245	250	30
	189	200	205	30		215	226	231	30
	192	203	208	30		268	279	284	30
	166	177	182	30		260	271	276	30
	196	207	212	30		224	235	240	30
	167	178	183	30		228	239	244	26
	168	179	184	30		208	219	224	30
	198	209	214	30		205	216	221	30
	202	213	218	30		203	214	219	30
	203	214	219	30		216	227	232	30
whitish & reddish	–	–	–	–	whitish & reddish	–	–	–	–
reddish	–	–	–	–	reddish	–	–	–	–
Kanab
Nv_033					Nv_034					Nv_035					Nv_036					Nv_037
N37 06 06.3 W112 32 52.8					N37 06 47.6 W112 33 16.3					N37 07 13.7 W112 33 49.9					N37 03 31.4 W112 34 02.7					N37 11 19.3 W112 39 26.3
	DAZ(0-360°)	corr.MD(0-360°)	corr.CR(0-360°)	dip_angle(°)		DAZ(0-360°)	corr.MD(0-360°)	corr.CR(0-360°)	dip_angle(°)		DAZ(0-360°)	corr.MD(0-360°)	corr.CR(0-360°)	dip_angle(°)		DAZ(0-360°)	corr.MD(0-360°)	corr.CR(0-360°)	dip_angle(°)		DAZ(0-360°)	corr.MD(0-360°)	corr.CR(0-360°)	dip_angle(°)
whitish	–	–	–	–	whitish	–	–	–	–	whitish	–	–	–	–	whitish	–	–	–	–	whitish	–	–	–	–
whitish & reddish	–	–	–	–	whitish & reddish	–	–	–	–	whitish & reddish	–	–	–	–	whitish & reddish	246	257	262	–	whitish & reddish	256	267	272	–
reddish	40	51	56	–	reddish	75	86	91	–	reddish	112	123	128	–		296	307	312	–		258	269	274	–
	62	73	78	–		59	70	75	–		134	145	150	–		156	167	172	–		244	255	260	–
	52	63	68	–		98	109	114	–		154	165	170	–		122	133	138	–		226	237	242	–
	41	52	57	–		152	163	168	–		124	135	140	–		196	207	212	–		120	131	136	–
	168	179	184	–		96	107	112	–		100	111	116	–		169	180	185	–		171	182	187	–
	225	236	241	–		176	187	192	–		108	119	124	–		230	241	246	–		212	223	228	–
	168	179	184	–							136	147	152	–		290	301	306	–		200	211	216	–
	225	236	241	–							141	152	157	–		297	308	313	–		150	161	166	–
	168	179	184	–							140	151	156	–		220	231	236	–	reddish	–	–	–	–
	158	169	174	–												100	111	116	–
	130	141	146	–												211	222	227	–
	82	93	98	–												124	135	140	–
															reddish	–	–	–	–
Nv_038					Nv_039					Nv_040					Nv_063
N37 02 31.2 W112 43 31.9					N37 06 26.4 W112 40 50.4					N37 09 38.7 W112 40 00.6					N37 15 07.9 W112 39 38.8
	DAZ(0-360°)	corr.MD(0-360°)	corr.CR(0-360°)	dip_angle(°)		DAZ(0-360°)	corr.MD(0-360°)	corr.CR(0-360°)	dip_angle(°)		DAZ(0-360°)	corr.MD(0-360°)	corr.CR(0-360°)	dip_angle(°)		DAZ(0-360°)	corr.MD(0-360°)	corr.CR(0-360°)	dip_angle(°)
whitish	–	–	–	–	whitish	–	–	–	–	whitish	–	–	–	–	whitish	–	–	–	–
whitish & reddish	150	161	166	–	whitish & reddish	260	271	276	–	whitish & reddish	142	153	158	–	whitish & reddish	–	–	–	–
	148	159	164	–		250	261	266	–		164	175	180	–	reddish	214	225	230	38
	134	145	150	–		214	225	230	–	reddish	–	–	–	–		226	237	242	34
	190	201	206	–		215	226	231	–							128	139	144	28
reddish	–	–	–	–		200	211	216	–							210	221	226	32
						254	265	270	–
						178	189	194	–
						212	223	228	–
						242	253	258	–
					reddish	–	–	–	–
White Cliff
Nv_028					Nv_029					Nv_030					Nv_031					Nv_032
N37 03 45.0 W112 21 42.8					N37 04 31.4 W112 21 49.2					N37 05 55.4 W112 22 31					N37 07 29.8 W112 23 14.1					N37 12 37.41 W112 23 8.69
	DAZ(0-360°)	corr.MD(0-360°)	corr.CR(0-360°)	dip_angle(°)		DAZ(0-360°)	corr.MD(0-360°)	corr.CR(0-360°)	dip_angle(°)		DAZ(0-360°)	corr.MD(0-360°)	corr.CR(0-360°)	dip_angle(°)		DAZ(0-360°)	corr.MD(0-360°)	corr.CR(0-360°)	dip_angle(°)		DAZ(0-360°)	corr.MD(0-360°)	corr.CR(0-360°)	dip_angle(°)
whitish	–	–	–	–	whitish	–	–	–	–	whitish	–	–	–	–	whitish	–	–	–	–	whitish	200	211	216	–
whitish & reddish	–	–	–	–	whitish & reddish	–	–	–	–	whitish & reddish	–	–	–	–	whitish & reddish	–	–	–	–		210	221	226	–
reddish	246	257	262	–	reddish	204	215	220	–	reddish	334	345	350	–	reddish	134	145	150	–		230	241	246	–
	338	349	354	–		201	212	217	–		186	197	202	–		134	145	150	–		230	241	246	–
	336	347	352	–		122	133	138	–												136	147	152	–
						97	108	113	–											whitish & reddish	–	–	–	–
						127	138	143	–											reddish	–	–	–	–
						164	175	180	–
Nv_149
N37 12 41.62 W112 23 8.02
	DAZ(0-360°)	corr.MD(0-360°)	corr.CR(0-360°)	dip_angle(°)
whitish	90	101	106	–
	60	71	76	–
	254	265	270	–
	270	281	286	–
	245	256	261	–
	170	181	186	–
	120	131	136	–
	105	116	121	–
	60	71	76	–
	200	211	216	–
	226	237	242	–
	194	205	210	–
	114	125	130	–
	130	141	146	–
	304	315	320	–
	105	116	121	–
	190	201	206	–
	180	191	196	–
	30	41	46	–
	290	301	306	–
	44	55	60	–
	18	29	34	–
	205	216	221	–
	78	89	94	–
	228	239	244	–
	330	341	346	–
	255	266	271	–
	180	191	196	–
	315	326	331	–
	30	41	46	–
	110	121	126	–
	165	176	181	–
	340	351	356	–
	230	241	246	–
	240	251	256	–
	110	121	126	–
whitish & reddish	–	–	–	–
reddish	–	–	–	–
Spencer Flat
Nv_041					Nv_042					Nv_043					Nv_044					Nv_045
N37 44 48.2 W111 27 13.9					N37 40 44.4 W111 22 23.7					N37 43 12.5 W111 24 13.6					N37 43 09.8 W111 24 21.0					N37 43 09.0 W111 24 44.6
	DAZ(0-360°)	corr.MD(0-360°)	corr.CR(0-360°)	dip_angle(°)		DAZ(0-360°)	corr.MD(0-360°)	corr.CR(0-360°)	dip_angle(°)		DAZ(0-360°)	corr.MD(0-360°)	corr.CR(0-360°)	dip_angle(°)		DAZ(0-360°)	corr.MD(0-360°)	corr.CR(0-360°)	dip_angle(°)		DAZ(0-360°)	corr.MD(0-360°)	corr.CR(0-360°)	dip_angle(°)
whitish	151	162	167	–	whitish	–	–	–	–	whitish	200	211	216	–	whitish	190	201	206	–	whitish	184	195	200	–
	170	181	186	–	whitish & reddish	124	135	140	–		220	231	236	–		154	165	170	–		44	55	60	–
	167	178	183	–		20	31	36	–	whitish & reddish	–	–	–	–	whitish & reddish	–	–	–	–		240	251	256	–
	140	151	156	–		106	117	122	–	reddish	–	–	–	–	reddish	–	–	–	–		222	233	238	–
	98	109	114	–		116	127	132	–												197	208	213	–
	62	73	78	–		136	147	152	–												218	229	234	–
	76	87	92	–		26	37	42	–											whitish & reddish	–	–	–	–
	94	105	110	–		126	137	142	–											reddish	–	–	–	–
whitish & reddish	138	149	154	–	reddish	–	–	–	–
	150	161	166	–
reddish	–	–	–	–
Nv_046					Nv_047					Nv_048					Nv_060					Nv_061
N37 43 00.7 W111 25 13.3					N37 43 05.6 W111 25 43.0					N37 43 10.9 W111 25 52.8					N37 47 30.7 W111 24 50.9					N37 47 43.5 W111 24 41.5
	DAZ(0-360°)	corr.MD(0-360°)	corr.CR(0-360°)	dip_angle(°)		DAZ(0-360°)	corr.MD(0-360°)	corr.CR(0-360°)	dip_angle(°)		DAZ(0-360°)	corr.MD(0-360°)	corr.CR(0-360°)	dip_angle(°)		DAZ(0-360°)	corr.MD(0-360°)	corr.CR(0-360°)	dip_angle(°)		DAZ(0-360°)	corr.MD(0-360°)	corr.CR(0-360°)	dip_angle(°)
whitish	204	215	220	–	whitish	223	234	239	–	whitish	148	159	164	–	whitish	–	–	–	–	whitish	–	–	–	–
	204	215	220	–		240	251	256	–		180	191	196	–	whitish & reddish	108	119	124	28	whitish & reddish	170	181	186	30
	174	185	190	–		204	215	220	–		130	141	146	–		264	275	280	24		72	83	88	24
	112	123	128	–		80	91	96	–		152	163	168	–		58	69	74	35		90	101	106	32
	105	116	121	–		180	191	196	–		150	161	166	–		100	111	116	22		90	101	106	34
	173	184	189	–		208	219	224	–		216	227	232	–		346	357	2	32		32	43	48	28
	230	241	246	–	whitish & reddish	–	–	–	–	whitish & reddish	–	–	–	–		180	191	196	32		72	83	88	24
	252	263	268	–	reddish	–	–	–	–	reddish	–	–	–	–		66	77	82	24		192	203	208	26
	198	209	214	–											reddish	–	–	–	–		66	77	82	24
	146	157	162	–																	96	107	112	34
whitish & reddish	–	–	–	–																	80	91	96	30
reddish	–	–	–	–																	118	129	134	22
																					294	305	310	20
																					130	141	146	22
																					306	317	322	24
																					14	25	30	20
																				reddish	–	–	–	–
Nv_062					Nv_110					Nv_111					Nv_112					Nv_113
N37 40 45.9 W111 22 34.5					N37 42 46.8 W111 22 18.9					N37 40 43.5 W111 22 24.9					N37 42 57.9 W111 23 33.1					N37 43 08.0 W111 24 24.4
	DAZ(0-360°)	corr.MD(0-360°)	corr.CR(0-360°)	dip_angle(°)		DAZ(0-360°)	corr.MD(0-360°)	corr.CR(0-360°)	dip_angle(°)		DAZ(0-360°)	corr.MD(0-360°)	corr.CR(0-360°)	dip_angle(°)		DAZ(0-360°)	corr.MD(0-360°)	corr.CR(0-360°)	dip_angle(°)		DAZ(0-360°)	corr.MD(0-360°)	corr.CR(0-360°)	dip_angle(°)
whitish	–	–	–	–	whitish	–	–	–	–	whitish	–	–	–	–	whitish	–	–	–	–	whitish	135	146	151	26
whitish & reddish	132	143	148	26	whitish & reddish	135	146	151	30	whitish & reddish	68	79	84	30		166	177	182	30		123	134	139	28
	38	49	54	30		128	139	144	30		110	121	126	30		176	187	192	30		161	172	177	28
	60	71	76	27	reddish	–	–	–	–		126	137	142	30		192	203	208	30		134	145	150	28
	120	131	136	18							58	69	74	30		134	145	150	30		151	162	167	26
	132	143	148	38							144	155	160	30		174	185	190	30		138	149	154	28
	56	67	72	40							6	17	22	30		178	189	194	30		106	117	122	28
	90	101	106	42							348	359	4	30	reddish	–	–	–	–		167	178	183	30
	84	95	100	24							149	160	165	30							152	163	168	28
	124	135	140	40							124	135	140	30							118	129	134	26
	126	137	142	28							144	155	160	30							169	180	185	30
	91	102	107	32							112	123	128	30							148	159	164	30
	90	101	106	42							72	83	88	30						whitish & reddish	–	–	–	–
	138	149	154	40						reddish	–	–	–	–						reddish	–	–	–	–
	116	127	132	42
	112	123	128	42
	125	136	141	38
	116	127	132	40
	138	149	154	32
	65	76	81	38
	70	81	86	44
	186	197	202	21
	128	139	144	46
	112	123	128	32
	100	111	116	48
	110	121	126	40
	156	167	172	42
	70	81	86	40
	135	146	151	44
	136	147	152	24
	130	141	146	32
	352	3	8	14
	100	111	116	24
	208	219	224	22
reddish	–	–	–	–
Nv_114					Nv_115					Nv_116					Nv_117					Nv_118
N37 43 08.9 W111 24 45.9					N37 43 07.5 W111 24 57.9					N7 43 7.74 W111 25 43.39					N37 43 12.02 W111 25 52.52					N37 43 07.8 W111 25 59.8
	DAZ(0-360°)	corr.MD(0-360°)	corr.CR(0-360°)	dip_angle(°)		DAZ(0-360°)	corr.MD(0-360°)	corr.CR(0-360°)	dip_angle(°)		DAZ(0-360°)	corr.MD(0-360°)	corr.CR(0-360°)	dip_angle(°)		DAZ(0-360°)	corr.MD(0-360°)	corr.CR(0-360°)	dip_angle(°)		DAZ(0-360°)	corr.MD(0-360°)	corr.CR(0-360°)	dip_angle(°)
whitish	258	269	274	30	whitish	178	189	194	28	whitish	123	134	139	28	whitish	55	66	71	25	whitish	166	177	182	30
	267	278	283	28		178	189	194	30		183	194	199	27		111	122	127	26		236	247	252	23
	50	61	66	30		193	204	209	30		170	181	186	26		76	87	92	25		182	193	198	30
	82	93	98	28		156	167	172	30		138	149	154	28		166	177	182	28		195	206	211	30
	103	114	119	30		112	123	128	25		146	157	162	27		164	175	180	28		112	123	128	30
	95	106	111	26		117	128	133	22		157	168	173	30		147	158	163	30		162	173	178	30
	104	115	120	24		160	171	176	26		198	209	214	26		147	158	163	30		210	221	226	30
whitish & reddish	–	–	–	–		154	165	170	28		254	265	270	26		150	161	166	30		172	183	188	30
reddish	–	–	–	–		236	247	252	28		266	277	282	24		148	159	164	28	whitish & reddish	–	–	–	–
						252	263	268	28		182	193	198	30		158	169	174	28	reddish	–	–	–	–
						208	219	224	30		268	279	284	22		164	175	180	28
					whitish & reddish	–	–	–	–		320	331	336	12	whitish & reddish	–	–	–	–
					reddish	–	–	–	–		210	221	226	30	reddish	–	–	–	–
											250	261	266	24
											192	203	208	23
										whitish & reddish	–	–	–	–
										reddish	–	–	–	–
Nv_119					Nv_120					Nv_121					Nv_122
N37 43 12.7 W111 26 04.5					N37 43 56.4 W111 26 44.1					N37 43 56.4 W111 26 44.1					N37 44 19.0 W111 26 42.9
	DAZ(0-360°)	corr.MD(0-360°)	corr.CR(0-360°)	dip_angle(°)		DAZ(0-360°)	corr.MD(0-360°)	corr.CR(0-360°)	dip_angle(°)		DAZ(0-360°)	corr.MD(0-360°)	corr.CR(0-360°)	dip_angle(°)		DAZ(0-360°)	corr.MD(0-360°)	corr.CR(0-360°)	dip_angle(°)
whitish	206	217	222	30	whitish	214	225	230	30	whitish	144	155	160	30	whitish	160	171	176	30
	178	189	194	26		206	217	222	30		110	121	126	28		118	129	134	30
	168	179	184	28		295	306	311	23		144	155	160	28		260	271	276	30
	195	206	211	30		168	179	184	28		232	243	248	30		218	229	234	26
	190	201	206	26	whitish & reddish	–	–	–	–		237	248	253	28		102	113	118	30
	226	237	242	30	reddish	–	–	–	–		186	197	202	26	whitish & reddish	–	–	–	–
	222	233	238	30						whitish & reddish	–	–	–	–	reddish	–	–	–	–
whitish & reddish	–	–	–	–						reddish	–	–	–	–
reddish	–	–	–	–
Bluff
Nv_050					Nv_065					Nv_066KUT
N37 30 04.0 W109 38 10.6					N37 02 21.8 W109 34 58.5					N37 15 46.7 W109 39 32.1
	DAZ(0-360°)	corr.MD(0-360°)	corr.CR(0-360°)	dip_angle(°)		DAZ(0-360°)	corr.MD(0-360°)	corr.CR(0-360°)	dip_angle(°)		DAZ(0-360°)	corr.MD(0-360°)	corr.CR(0-360°)	dip_angle(°)
whitish	349	0	5	–	whitish	170	181	186	26	whitish	126	137	142	18
	288	299	304	–		138	149	154	28		95	106	111	22
	209	220	225	–		123	134	139	30		62	73	78	22
	209	220	225	–		104	115	120	28		171	182	187	29
	305	316	321	–		116	127	132	31		132	143	148	27
whitish & reddish	–	–	–	–		178	189	194	26		125	136	141	20
reddish	–	–	–	–		192	203	208	24		184	195	200	29
						80	91	96	10		39	50	55	26
						128	139	144	14		113	124	129	24
						128	139	144	20		143	154	159	21
						231	242	247	26		216	227	232	31
						244	255	260	27		171	182	187	33
						196	207	212	27		107	118	123	18
						199	210	215	26		133	144	149	25
						176	187	192	29		180	191	196	22
						172	183	188	30		101	112	117	20
						153	164	169	32		178	189	194	32
						154	165	170	28		92	103	108	14
						183	194	199	30		199	210	215	16
						123	134	139	31		125	136	141	20
						80	91	96	31		344	355	360	29
						95	106	111	33		101	112	117	21
						136	147	152	29	whitish & reddish	–	–	–	–
						83	94	99	28	reddish	–	–	–	–
						202	213	218	29
						93	104	109	23
						166	177	182	26
						114	125	130	25
						124	135	140	24
						86	97	102	21
						163	174	179	25
						164	175	180	26
						188	199	204	31
						246	257	262	33
						237	248	253	29
						195	206	211	29
					whitish & reddish	–	–	–	–
					reddish	–	–	–	–
W.Colorado City
Nv_064
N37 01 55.5 W113 03 33.2
	DAZ(0-360°)	corr.MD(0-360°)	corr.CR(0-360°)	dip_angle(°)
whitish	–	–	–	–
whitish & reddish	–	–	–	–
reddish	172	183	188	22
	152	163	168	20
	138	149	154	24
	170	181	186	24
	198	209	214	38
Valley of Fire
A_001KUT					A_002KUT					A_003KUT					A_004KUT					A_005KUT
N36 25 46.8 W114 30 51.4					N36 26 03.0 W114 31 0.20					N36 26 26.7 W114 30 59.3					N36 26 57.4 W114 30 54.8					N36 27 19.7 W114 31 01.8
	DAZ(0-360°)	corr.MD(0-360°)	corr.CR(0-360°)	dip_angle(°)		DAZ(0-360°)	corr.MD(0-360°)	corr.CR(0-360°)	dip_angle(°)		DAZ(0-360°)	corr.MD(0-360°)	corr.CR(0-360°)	dip_angle(°)		DAZ(0-360°)	corr.MD(0-360°)	corr.CR(0-360°)	dip_angle(°)		DAZ(0-360°)	corr.MD(0-360°)	corr.CR(0-360°)	dip_angle(°)
whitish	–	–	–	–	whitish	–	–	–	–	whitish	–	–	–	–	whitish	–	–	–	–	whitish	109	120	125	17
whitish & reddish	–	–	–	–	whitish & reddish	–	–	–	–	whitish & reddish	–	–	–	–	whitish & reddish	94	105	110	14		170	181	186	48
reddish	204	215	220	12	reddish	285	296	301	31	reddish	224	235	240	27		73	84	89	4		252	263	268	18
	138	149	154	27		253	264	269	34		99	110	115	11		260	271	276	27		101	112	117	21
	124	135	140	6		357	8	13	14		107	118	123	16		259	270	275	14		303	314	319	4
	207	218	223	4		100	111	116	30		55	66	71	20		31	42	47	9		276	287	292	12
	247	258	263	14		221	232	237	60		123	134	139	37		112	123	128	32		88	99	104	18
	143	154	159	14		128	139	144	40		8	19	24	2		163	174	179	52		276	287	292	34
	153	164	169	25		150	161	166	18		131	142	147	36		244	255	260	34		115	126	131	26
	163	174	179	38		298	309	314	15		51	62	67	17		127	138	143	8		134	145	150	23
	208	219	224	34		213	224	229	44		114	125	130	25		17	28	33	36		92	103	108	8
	170	181	186	63		195	206	211	6		135	146	151	44		110	121	126	18		120	131	136	9
	168	179	184	56		274	285	290	31		358	9	14	6		233	244	249	20		146	157	162	25
	211	222	227	55		278	289	294	26		79	90	95	12		314	325	330	21	whitish & reddish	–	–	–	–
	212	223	228	51		238	249	254	33		137	148	153	27		116	127	132	17	reddish	–	–	–	–
	200	211	216	29		204	215	220	35		239	250	255	14		276	287	292	12
						252	263	268	28		156	167	172	18	reddish	–	–	–	–
						13	24	29	16		283	294	299	32
						301	312	317	11		255	266	271	19
						144	155	160	16		163	174	179	15
						132	143	148	27		198	209	214	14
						114	125	130	42		237	248	253	49
A_006KUT
N36 24 46.8 W114 32 52.4
	DAZ(0-360°)	corr.MD(0-360°)	corr.CR(0-360°)	dip_angle(°)
whitish	269	280	285	45
	266	277	282	41
	202	213	218	57
	189	200	205	63
	162	173	178	37
	206	217	222	61
	245	256	261	61
	260	271	276	28
	259	270	275	51
	239	250	255	63
	215	226	231	48
	227	238	243	48
	181	192	197	28
	136	147	152	4
	207	218	223	8
	217	228	233	55
	183	194	199	52
	164	175	180	47
	168	179	184	52
	156	167	172	41
	200	211	216	50
	188	199	204	58
	121	132	137	44
	188	199	204	50
	161	172	177	62
	220	231	236	32
	201	212	217	35
	217	228	233	53
	181	192	197	18
	183	194	199	39
	132	143	148	33
whitish & reddish	–	–	–	–
reddish	–	–	–	–
Red rock canyon
A_007KUT					A_008KUT					A_009KUT					A_010KUT
N36 08 45.4 W115 25 50.5					N36 09 07.0 W115 26 14.9					N36 09 42.4 W115 26 58.8					N36 09 39.0 W115 26 53.6
	DAZ(0-360°)	corr.MD(0-360°)	corr.CR(0-360°)	dip_angle(°)		DAZ(0-360°)	corr.MD(0-360°)	corr.CR(0-360°)	dip_angle(°)		DAZ(0-360°)	corr.MD(0-360°)	corr.CR(0-360°)	dip_angle(°)		DAZ(0-360°)	corr.MD(0-360°)	corr.CR(0-360°)	dip_angle(°)
whitish	–	–	–	–	whitish	–	–	–	–	whitish	94	105	110	60	whitish	179	190	195	22
whitish & reddish	–	–	–	–	whitish & reddish	154	165	170	47		259	270	275	5		118	129	134	39
reddish	249	260	265	19		154	165	170	38		113	124	129	39		145	156	161	25
	147	158	163	41		63	74	79	16		128	139	144	42		115	126	131	49
	133	144	149	54		89	100	105	14		137	148	153	28		294	305	310	5
	118	129	134	33		237	248	253	26		110	121	126	14		172	183	188	18
	258	269	274	21		122	133	138	21		186	197	202	46		102	113	118	43
	171	182	187	40		153	164	169	38		152	163	168	22		109	120	125	31
	191	202	207	42		213	224	229	23		192	203	208	29		271	282	287	16
	223	234	239	18		114	125	130	30		17	28	33	14		87	98	103	26
	254	265	270	14		153	164	169	4		144	155	160	19		250	261	266	11
	202	213	218	24		170	181	186	41		288	299	304	23		73	84	89	37
	117	128	133	49		143	154	159	42		160	171	176	13		202	213	218	11
	129	140	145	30		147	158	163	36		137	148	153	21		188	199	204	21
	171	182	187	41		154	165	170	26		97	108	113	12		200	211	216	17
	135	146	151	41		167	178	183	35		152	163	168	37		93	104	109	47
	156	167	172	41		164	175	180	40		120	131	136	38		132	143	148	13
	236	247	252	41		206	217	222	30		248	259	264	16		164	175	180	34
	232	243	248	15		232	243	248	22		324	335	340	3		56	67	72	23
	115	126	131	34		116	127	132	26		167	178	183	23		73	84	89	49
	234	245	250	17		203	214	219	41		170	181	186	31		202	213	218	4
	159	170	175	42		144	155	160	36		96	107	112	35		10	21	26	8
	140	151	156	48		240	251	256	9		139	150	155	10		20	31	36	5
	215	226	231	21	reddish	–	–	–	–		106	117	122	43		331	342	347	7
	153	164	169	47							110	121	126	41		34	45	50	21
	182	193	198	42							177	188	193	23		202	213	218	51
	133	144	149	37							29	40	45	23		97	108	113	54
	213	224	229	36							172	183	188	14	whitish & reddish	155	166	171	34
	111	122	127	52						whitish & reddish	–	–	–	–		121	132	137	44
	60	71	76	9						reddish	–	–	–	–		9	20	25	16
	207	218	223	26												93	104	109	39
	144	155	160	36												124	135	140	36
																160	171	176	25
																108	119	124	4
																108	119	124	40
																102	113	118	10
															reddish	–	–	–	–

## Sheet: Southern area
DAZ = dip azimuth no correction (positive eastward)						Formation	bed colour
corr.MD = dip azimuth with correct for the modern magnetic declination (+11°)						Navajo Ss.	whitish
corr.CR = dip azimuth with correct for the magnetic declination and post-Jurassic continental clockwise rotation (+5°)						Nugget Ss.	whitish & reddish
* = We have not used to this study due to distant view measurements or vague sedimentary structures						Aztec Ss.	reddish
KUT = tilting correction with KUT
We have used azimuth data whose angle is between 25°-40° to rose diagrams
Horseshoe Bend
Nv_017					Nv_018					Nv_019					Nv_020					Nv_021
N36 52 35.1 W111 30 08.0					N36 52 39.0 W111 30 23.3					N36 52 43.3 W111 30 29.2					N36 52 44.6 W111 30 37.2					N36 52 44.6 W111 30 02.0
	DAZ(0-360°)	corr.MD(0-360°)	corr.CR(0-360°)	dip_angle(°)		DAZ(0-360°)	corr.MD(0-360°)	corr.CR(0-360°)	dip_angle(°)		DAZ(0-360°)	corr.MD(0-360°)	corr.CR(0-360°)	dip_angle(°)		DAZ(0-360°)	corr.MD(0-360°)	corr.CR(0-360°)	dip_angle(°)		DAZ(0-360°)	corr.MD(0-360°)	corr.CR(0-360°)	dip_angle(°)
whitish	–	–	–	–	whitish	–	–	–	–	whitish	–	–	–	–	whitish	–	–	–	–	whitish	–	–	–	–
	138	149	154	–	whitish & reddish	100	111	116	–	whitish & reddish	50	61	66	–	whitish & reddish	138	149	154	–	whitish & reddish	123	134	139	–
reddish	–	–	–	–		66	77	82	–		36	47	52	–		98	109	114	–		154	165	170	–
					reddish	–	–	–	–		98	109	114	–		80	91	96	–		67	78	83	–
											98	109	114	–	reddish	66	77	82	–		108	119	124	–
											92	103	108	–		242	253	258	–		126	137	142	–
											120	131	136	–		116	127	132	–		116	127	132	–
											125	136	141	–							122	133	138	–
											206	217	222	–							160	171	176	–
											156	167	172	–							136	147	152	–
											148	159	164	–							110	121	126	–
											195	206	211	–							88	99	104	–
											127	138	143	–							70	81	86	–
											170	181	186	–							94	105	110	–
											208	219	224	–							70	81	86	–
										reddish	–	–	–	–							77	88	93	–
																					162	173	178	–
																					78	89	94	–
																					126	137	142	–
																					94	105	110	–
																					130	141	146	–
																					118	129	134	–
																					135	146	151	–
																				reddish	–	–	–	–
W.Kaibito
Nv_022					Nv_026					Nv_027
N36 36 14.2 W111 10 32.3					N36 37 04.6 W111 11 40.8					N36 37 36.7 W111 12 14.5
	DAZ(0-360°)	corr.MD(0-360°)	corr.CR(0-360°)	dip_angle(°)		DAZ(0-360°)	corr.MD(0-360°)	corr.CR(0-360°)	dip_angle(°)		DAZ(0-360°)	corr.MD(0-360°)	corr.CR(0-360°)	dip_angle(°)
whitish	–	–	–	–	whitish	–	–	–	–	whitish	–	–	–	–
whitish & reddish	132	143	148	–	whitish & reddish	–	–	–	–	whitish & reddish	–	–	–	–
	164	175	180	–		62	73	78	–	reddish	50	61	66	–
	120	131	136	–	reddish	33	44	49	–		168	179	184	–
reddish	–	–	–	–		55	66	71	–		48	59	64	–
											40	51	56	–
											162	173	178	–
Square Butte
Nv_025
N36 35 36.1 W110 53 59.8
	DAZ(0-360°)	corr.MD(0-360°)	corr.CR(0-360°)	dip_angle(°)
whitish	138	149	154	–
	170	181	186	–
	105	116	121	–
	175	186	191	–
whitish & reddish	–	–	–	–
reddish	–	–	–	–
Shonto
Nv_023					Nv_024
N36 30 06.8 W110 42 20.3					N36 33 44.3 W110 43 36.9
	DAZ(0-360°)	corr.MD(0-360°)	corr.CR(0-360°)	dip_angle(°)		DAZ(0-360°)	corr.MD(0-360°)	corr.CR(0-360°)	dip_angle(°)
whitish	–	–	–	–	whitish	–	–	–	–
whitish & reddish	–	–	–	–	whitish & reddish	–	–	–	–
reddish	94	105	110	–	reddish	42	53	58	–
	100	111	116	–		54	65	70	–
	78	89	94	–
	98	109	114	–
	102	113	118	–
	72	83	88	–

## Sheet: Northern area_corrected data
	DAZ = dip azimuth no correction (positive eastward)						Formation	bed colour
	corr.MD = dip azimuth with correct for the modern magnetic declination (+11°)						Navajo Ss.	whitish
	corr.CR = dip azimuth with correct for the magnetic declination and post-Jurassic continental clockwise rotation (+5°)						Nugget Ss.	whitish & reddish
	* = We have not used to this study due to distant view measurements or vague sedimentary structures						Aztec Ss.	reddish
	KUT = tilting correction with KUT
	We have used azimuth data whose angle is between 25°-40° to rose diagrams
	Northern group
	Kelly		Lander		Weiser Knoll		Sheep Creek Gap		Vernal		Dinosaur
	64	Ng_016KUT	190	Ng_008	284	Ng_006	200	Ng_015	60	Ng_001	241	Nv_076
	115		212		254		150		224	Ng_002	248
	63		92		170		184		205		243
	116		199		171		251		253		198
	205		25		358		34		182		210
			154		114		177		176	Ng_003	266
			163		165	Ng_007	8		170		198
			84		321		258		129		208
			197	Ng_009	60		110		204		248
			203		125		304		161	Ng_004	248
			89		292		206		145		234
			91		326		256		194		246
			155	Ng_010	125		62		203		232
			291		171		166		203		186	Nv_077
			100		144		118		160		222
			170		139		334		240		229
			98		300		142		201		224	Nv_078
			117		272		210		210		212
			18		73		260		290		266	Nv_079
			104		131		255		186		44
			219		166		181		212		238
			140		245		163		253		279
			47		143				230	Ng_005	264
			232		283				212		246
			144		31				233		248
			75		256	Ng_012			245		184
			216						181		250
			129						253		224
			105						209	Nv_075KUT	310
			164	Ng_11					286		46
			174						139		248
			205						271		224
			331						45
			157						42
			196						52
			91						324
			324						32
			259						57
			216						188
			165						60
			151						261
			202
			202

## Sheet: Southeastern area_corrected dat
	DAZ = dip azimuth no correction (positive eastward)						Formation	bed colour
	corr.MD = dip azimuth with correct for the modern magnetic declination (+11°)						Navajo Ss.	whitish
	corr.CR = dip azimuth with correct for the magnetic declination and post-Jurassic continental clockwise rotation (+5°)						Nugget Ss.	whitish & reddish
	* = We have not used to this study due to distant view measurements or vague sedimentary structures						Aztec Ss.	reddish
	KUT = tilting correction with KUT
	We have used azimuth data whose angle is between 25°-40° to rose diagrams
	Southeastern group
	Temple Mountain		Fruita		Canyonlands		Arches		Lightning Dlow		Bouler
	331	Nv_052KUT	163	Nv_151	163	Nv_069	186	Nv_068u	96	Nv_067	96	Nv_058
	183	Nv_054KUT	166		280		160		142		120
	166		134		108		135		82		134
	201		220		130		115		116		206	Nv_059
	160		214		91		166		134		142
	194		168		105		104		290		184
	197		146		274		102		144		256
	177		146		68		34		166		206
	52		144		88		79		116		220
	93		72		126		174		34		178
	100	Nv_150	116		304		76				200
	105		191		36		102				176
	135		166		354		222				208
	140		176		11		215				84
	115		124		114		82				132
	95		70		49		230
	135		100		182		214
	125		110		170		176
	145		206		122	Nv_070	325
	165		70		170		36
	175		110	Nv_049	264		154
	85		74		110		224
	235		112		94		342
	215		248	Nv_055	218		246
	185		191		86		267
			152		260	Nv_071KUT	233
			108		242		148
			174		246		184
			79	Nv_152	317		182
			75		229		246
			58		252		62
			225		264		76
			127		284		234
			127		102	Nv_072	206	Nv_080
			55		150		213
					88		142
					146		134
					146		202
					22		134
					260		192
					78		220
					83		208
					111		210
					194		212
					28		210
					179		146
					169		198
					351		214
					298	Nv_073	218
					96		124
					326		170
					318		134
					350		158
					326		140
					136		212
					138		216
					126		161	Nv_081
					66		350
					132	Nv_074	12
					98		170
					138		208
					140		161
					141		226
					122		218
					164		178
					110		204
					91		224
					64		228	Nv_082
					85		221
					248		168
					157		213
					212		220
					140		204
					88		210
					214		209
					112		223
					58		182	Nv_083
					254		98
					242		204
					234		149
					169		118
					234		168
					269		189
					216		198
					76		175
					186		151
							147
							120
							220
							290
							168
							255
							134
							129	Nv_084
							162
							190
							142
							178
							88
							290
							143
							151
							138
							253
							160	Nv_085
							211
							136
							74
							54
							154
							190
							162
							254
							270
							164
							230
							144
							180
							146
							170
							151
							153
							146
							186
							240
							154
							146
							150
							188
							182	Nv_086
							162
							208
							198
							174
							170
							48
							213
							208
							182
							218
							202
							86
							115
							159
							180
							114	Nv_087
							164
							140
							212
							254
							212
							203
							197
							197
							235
							172
							169
							194
							188
							98	Nv_088
							242
							82
							60
							102
							206
							206
							186
							136
							139
							268
							156
							178
							108
							144
							194
							170
							185
							182
							30
							152
							156	Nv_089
							150
							156
							226
							146
							166
							96
							206
							260
							72
							128
							188
							140
							174
							216
							180
							160
							78	Nv_090
							73
							276
							260
							62
							110
							194
							154
							180
							218
							94
							270
							260
							122
							198
							234
							186
							152
							258	Nv_091
							170
							214
							192
							181
							164
							236
							264
							269
							232
							192
							162
							200	Nv_092
							187
							176
							152
							155
							210
							238
							161	Nv_093
							158
							182
							194
							234
							192
							172
							157
							148	Nv_094
							168
							154
							156
							214	Nv_095
							178
							116	Nv_096
							143
							206
							169
							211
							164
							164
							108
							151
							172
							123
							129
							156
							169
							150
							110
							134
							134
							168	Nv_097
							154
							170
							148
							173
							175
							192
							182
							188
							173
							183
							202
							130
							114
							246
							179
							84	Nv_098
							204
							132
							89
							90
							234
							281
							104
							251
							265
							272
							84
							114
							104
							267
							138
							206
							158
							243
							157	Nv_099
							64
							188
							37
							61
							188
							146
							102
							78
							136
							116
							162
							128	Nv_100
							154
							158
							178
							188
							120	Nv_101
							78
							151
							142
							162
							188
							168
							143
							190
							73
							202	Nv_102
							232
							212
							200
							238
							220
							232
							237
							160	Nv_103
							122
							156
							96
							193
							142
							135
							226
							99
							118
							138	Nv_104
							125
							172	Nv_105
							156
							188
							158
							156
							152
							202
							174
							253
							231
							204
							168
							96
							200
							189
							146
							164	Nv_106
							138
							224
							228
							216
							142
							190
							169
							169
							174
							184
							126
							159
							184
							192
							208
							202
							236
							202
							154
							161
							63
							186
							131
							151
							182	Nv_107
							140
							228
							160
							160
							246
							148
							143
							164
							224
							129
							162
							235
							135
							248
							191
							102
							202	Nv_108
							211
							211
							160	Nv_109
							204
							182
							238
							92
							132
							162
							134
							188
							32
							129
							258
							186
							126	Nv_068m
							156
							298
							134
							241

## Sheet: Southwestern area_corrected dat
	DAZ = dip azimuth no correction (positive eastward)						Formation	bed colour
	corr.MD = dip azimuth with correct for the modern magnetic declination (+11°)						Navajo Ss.	whitish
	corr.CR = dip azimuth with correct for the magnetic declination and post-Jurassic continental clockwise rotation (+5°)						Nugget Ss.	whitish & reddish
	* = We have not used to this study due to distant view measurements or vague sedimentary structures						Aztec Ss.	reddish
	KUT = tilting correction with KUT
	We have used azimuth data whose angle is between 25°-40° to rose diagrams
	Southwestern group
	Zion		Kanab		White Cliff		Spencer Flat		Bluff		W.Colorado City		Valley of Fire		Red rock canyon
	128	Nv_005u	56	Nv_033	262	Nv_028	167	Nv_041u	5	Nv_050	188	Nv_064	178	A_006KUT	134	A_007KUT
	118	Nv_006u	78		354		186		304		168		276		187
	246		68		352		183		225		154		197		145
	356	Nv_008u	57		220	Nv_029	156		225		186		236		131
	142	Nv_11u	184		217		114		321		214		217		149
	316		241		138		78		186	Nv_065			199		229
	246	Nv_013u	184		113		92		154				148		223
	146	Nv_014u	241		143		110		139				276	A_004KUT	160
	312		184		180		216	Nv_043	120				128		170	A_008KUT
	208		174		350	Nv_30	236		132				260		253
	208		146		202		206	Nv_044	194				33		169
	218		98		150	Nv_31	170		247				292	A_005KUT	130
	300		91	Nv_034	150		200	Nv_045	260				131		163
	274	Nv_015	75		216	Nv_32	60		212				162		170
	242		114		226		256		215				154	A_001KUT	183
	242		168		246		238		192				169		180
	234		112		246		213		188				179		222
	244		192		152		234		169				224		132
	212		128	Nv_035	106	Nv_149	220	Nv_046	170				216		160
	256	Nv_016	150		76		220		199				301	A_002KUT	129	A_009KUT
	142		170		270		190		139				269		153
	226		140		286		128		96				116		208
	216	Nv_123	116		261		121		111				144		168
	184		124		186		189		152				290		136
	203		152		136		246		99				294		186
	19	Nv_124	157		121		268		218				254		112
	272		156		76		214		182				220		134	A_010KUT
	344		262	Nv_036	216		162		130				268		161
	246		312		242		239	Nv_047	179				148		125
	124		172		210		256		180				240	A_003KUT	103
	328		138		130		220		204				139		89
	254		212		146		96		262				147		180
	233		185		320		196		253				130		171
	224		246		121		224		211				153		109
	183		306		206		164	Nv_048	187	Nv_066KUT			299		140
	230		313		196		196		148						176
	209		236		46		146		200						124
	269	Nv_125	116		306		168		55
	114		227		60		166		232
	274		140		34		232		187
	202		272	Nv_037	221		151	Nv_113	149
	170		274		94		139		194
	268		260		244		177		360
	4	Nv_144	242		346		150
	324		136		271		167
	9		187		196		154
	168		228		331		122
	162		216		46		183
	252		166		126		168
	212		166	Nv_038	181		134
	281		164		356		185
	202		150		246		164
	238		206		256		274	Nv_114
	238		276	Nv_039	126		283
	340		266				66
	218		230				98
	207	Nv_145	231				119
	179		216				111
	173		270				194	Nv_115
	175		194				194
	159		228				209
	174		258				172
	178		158	Nv_040			128
	152		180				176
	149		230	Nv_063			170
	169		242				252
	164		144				268
	154		226				224
	152						139	Nv_116
	165						199
	130	Nv_146					186
	208						154
	193						162
	188						173
	239						214
	228						270
	194						198
	254						226
	276						71	Nv_117
	226						127
	188						92
	190						182
	204						180
	232						163
	344						163
	300						166
	110						164
	178	Nv_147					174
	205						180
	208						182	Nv_118
	182						198
	212						211
	183						128
	184						178
	214						226
	218						188
	219						222	Nv_119
	250	Nv_148					194
	231						184
	284						211
	276						206
	240						242
	244						238
	224						230	Nv_120
	221						222
	219						184
	232						160	Nv_121
	174	Nv_001					126
	156						160
	194						248
	184						253
	210						202
	210						176	Nv_122
	180	Nv_002					134
	166						276
	226						234
	222	Nv_003					118
	206	Nv_004m					154	Nv_041m
	226						166
	168	Nv_005m					140	Nv_042
	220						36
	232	Nv_006m					122
	164	Nv_007					132
	256						152
	256						42
	104	Nv_008m					142
	360						124	Nv_060
	346						74
	118						2
	266	Nv_009					196
	221						186	Nv_061
	244						106
	282						106
	158	Nv_010					48
	166						208
	286						112
	152						96
	346						148	Nv_062
	210						54
	236						76
	194	Nv_011m					148
	256						72
	148						140
	214						142
	148						107
	286						154
	266	Nv_012					141
	120						132
	186						154
	244	Nv_013m					81
	242						128
	156						126
	176						86
	176						146
	292						151	Nv_110
	146	Nv_014m					144
	346						84	Nv_111
	260						126
	276						142
	326						74
	210						160
	230	Nv_126					22
	110						4
	234						165
	93						140
	98						160
	142						128
	252						88
	164						182	Nv_112
	190						192
	210	Nv_127					208
	233						150
	228						190
	190						194
	160
	122
	174
	98
	131
	222	Nv_128
	231
	76
	251
	230
	119
	70
	138
	151
	191
	172
	168
	162
	154
	86	Nv_129
	304
	134
	335
	268
	138
	329
	113
	128
	161	Nv_130
	250
	243
	222
	116
	178
	198
	238	Nv_131
	144
	268
	186
	214
	154
	248
	176
	232
	110
	122	Nv_132
	174
	104
	148
	144
	108
	184
	100
	130
	171
	176
	134
	224
	115
	140
	229
	184
	212
	164
	189
	202
	222
	229	Nv_133
	258
	68
	96
	203
	174
	184
	193
	70
	48
	122
	99
	111
	210	Nv_134
	190
	120
	114
	301
	136
	294
	144
	155
	151	Nv_135
	284
	260
	262	Nv_136
	270
	212
	232
	210
	189
	144
	243
	281	Nv_137
	324
	140
	254
	254
	128
	293
	252
	206
	218	Nv_138
	218
	282
	354
	320
	162
	154
	144
	283
	112
	233
	138
	284
	269
	309
	312
	278
	53
	192
	132
	140
	111
	282
	282
	132
	53
	140	Nv_139
	151
	154
	101
	136
	112
	120
	213
	154
	138
	130
	123
	150
	90
	121
	312
	141	Nv_140
	258
	280
	278
	202
	204
	192
	206
	226
	281
	249
	282
	310
	188
	300
	234
	262
	299
	302
	236
	140	Nv_141
	192
	174
	170
	180
	124
	160
	151
	150
	150
	211
	162
	198
	230
	220	Nv_142
	224
	138
	244
	110
	259
	123
	129
	122
	193
	158
	132
	114
	179	Nv_143
	152
	278
	164
	189
	194
	172
	175
	178
	178
	181
	206	Nv_004
	136	Nv_006

## Sheet: Southern area_corrected data
	DAZ = dip azimuth no correction (positive eastward)						Formation	bed colour
	corr.MD = dip azimuth with correct for the modern magnetic declination (+11°)						Navajo Ss.	whitish
	corr.CR = dip azimuth with correct for the magnetic declination and post-Jurassic continental clockwise rotation (+5°)						Nugget Ss.	whitish & reddish
	* = We have not used to this study due to distant view measurements or vague sedimentary structures						Aztec Ss.	reddish
	KUT = tilting correction with KUT
	We have used azimuth data whose angle is between 25°-40° to rose diagrams
	South group
	Horseshoe Bend		W.Kaibito		Square Butte		Shonto
	154	Nv_017	148	Nv_022	154	Nv_025	110	Nv_023
	116	Nv_018	180		186		116
	82		136		121		94
	66	Nv_019	78	Nv_026	191		114
	52		49				118
	114		71				88
	114		66	Nv_027			58	Nv_024
	108		184				70
	136		64
	141		56
	222		178
	172
	164
	211
	143
	186
	224
	154	Nv_020
	114
	96
	82
	258
	132
	139	Nv_021
	170
	83
	124
	142
	132
	138
	176
	152
	126
	104
	86
	110
	86
	93
	178
	94
	142
	110
	146
	134
	151

## Sheet: Bounding surface thickness
	Zion National Park			thickness (m)
	Middle	Outcrop1	37°13'20.73"N, 112°54'59.38"W	3.00063
				2.0425
				2.29125
				1.7525
				1.6025
				1.265
				1.7
				1.65687
		Outcrop2	37°13'7.65"N, 112°55'7.59"W	2.50261
				3.15706
				3.15706
				2.92344
				2.92344
				3.5811
				3.41468
	Upper	Outcrop3	37°13'21.93"N, 112°53'52.47"W	2.08998
	Middle	Outcrop4	37°13'30.32"N, 112°54'8.37"W	2.48343
				2.73271
				3.18067
		Outcrop5	37°13'4.59"N, 112°55'1.96"W	5.36298
				4.11979
				3.19594
				4.11979
				3.65536
				2.5756
				3.0592
	Upper	Outcrop6	37°13'27.69"N, 112°54'4.08"W	4.12997
				4.83301
				4.39106
				3.34498
	Middle	Outcrop7	37°13'31.60"N, 112°53'42.89"W	4.34504
		Outcrop8	37°13'27.75"N, 112°54'13.75"W	3.98092
				2.94758
				2.94758
				2.64032
				1.95824
				2.32757
				3.08352
				2.64032
		Outcrop9	37°13'13.02"N, 112°54'59.58"W	3.22273
				3.15795
				2.55568
				3.90682
				2.625
				2.60227
				1.69318
			Ave	2.97565
			SD	0.891228
			Median	2.94758
